# Supplementary material for: Synthesis of amides through an oxidative amidation of tetrazoles with aldehydes under transition-metal-free conditions
Source: Royal Society of Chemistry journal article supplement (doi:10.1039/c4ra07658c), 2014-01-01

## ***Supporting Information***

# **Syntheses of Amides by Oxidative Amidation of Tetrazoles with Aldehydes under Trans-Metal-Free Conditions**

Juan Du, Kai Luo, and Xiuli Zhang\*

*Department of Chemistry, Anhui Agricultural University, Hefei, Anhui 230036, P R China*

*Tel: + 86-551-65786-791 Fax: + 86-551-65786-121*

*E-mail: zhxiuli@163.com*

### ***Table of Contents for Supporting Information***

|                                                                  |   |
|------------------------------------------------------------------|---|
| <sup>1</sup> H and <sup>13</sup> C NMR spectra of compounds..... | 2 |
|------------------------------------------------------------------|---|

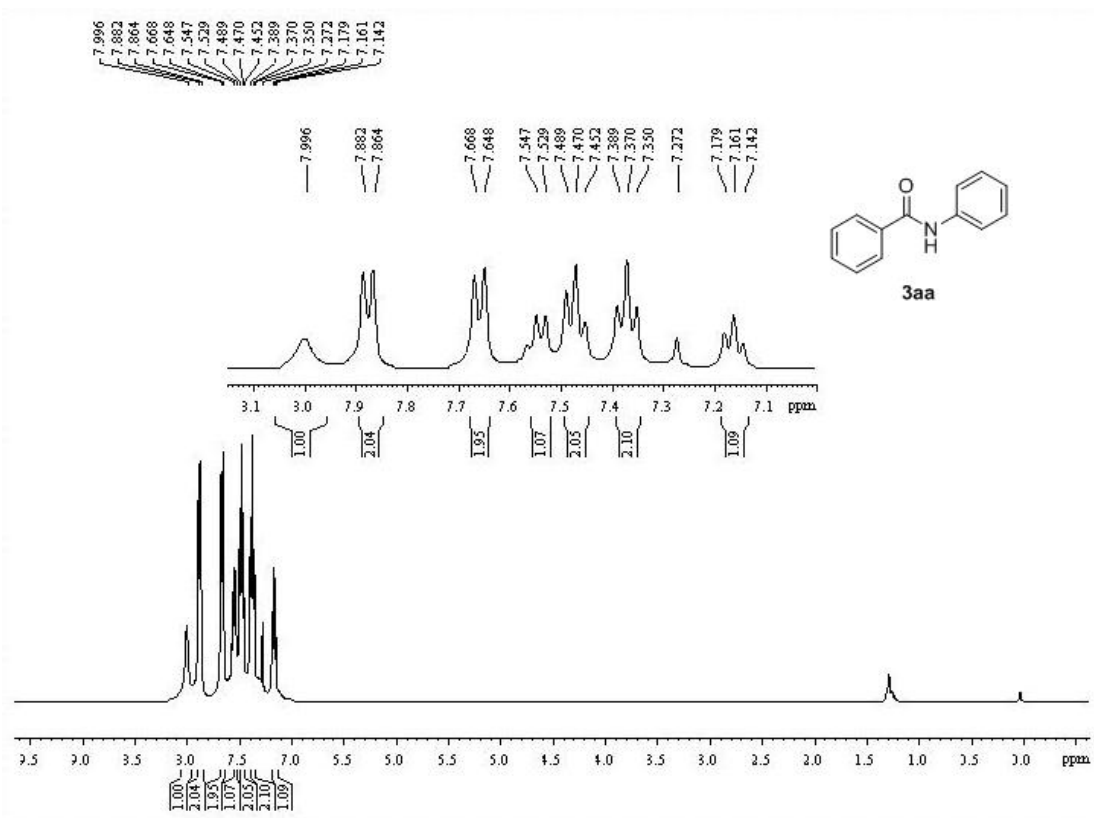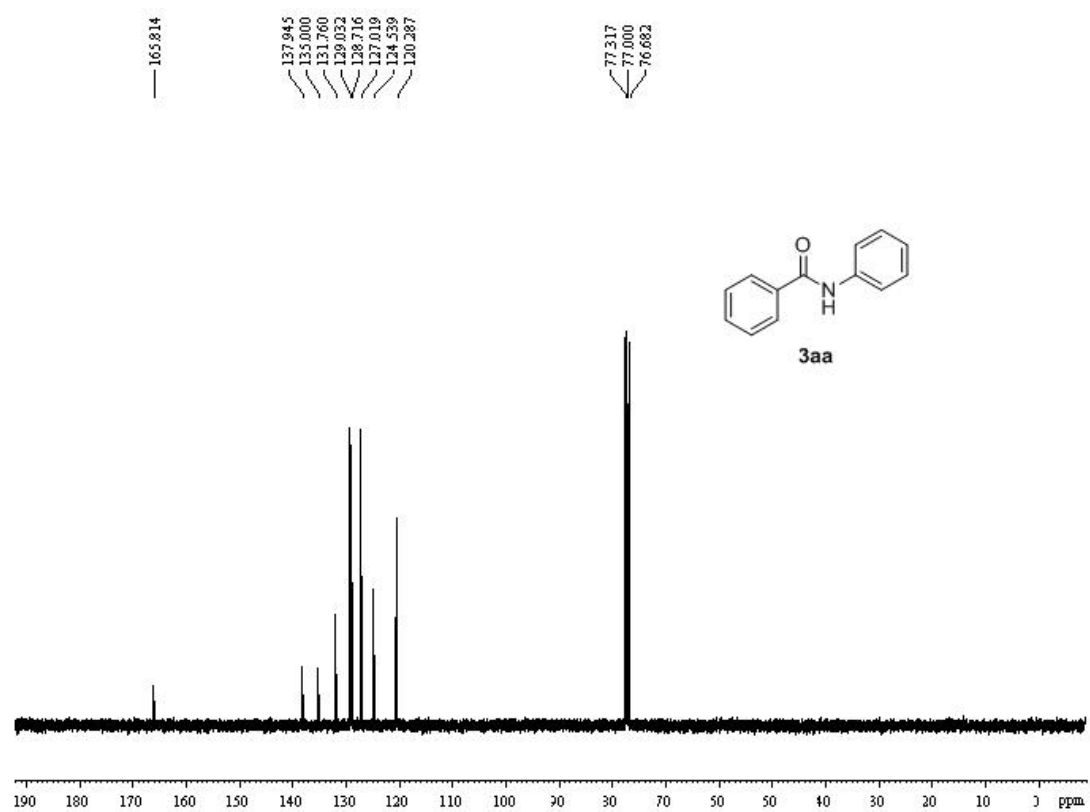

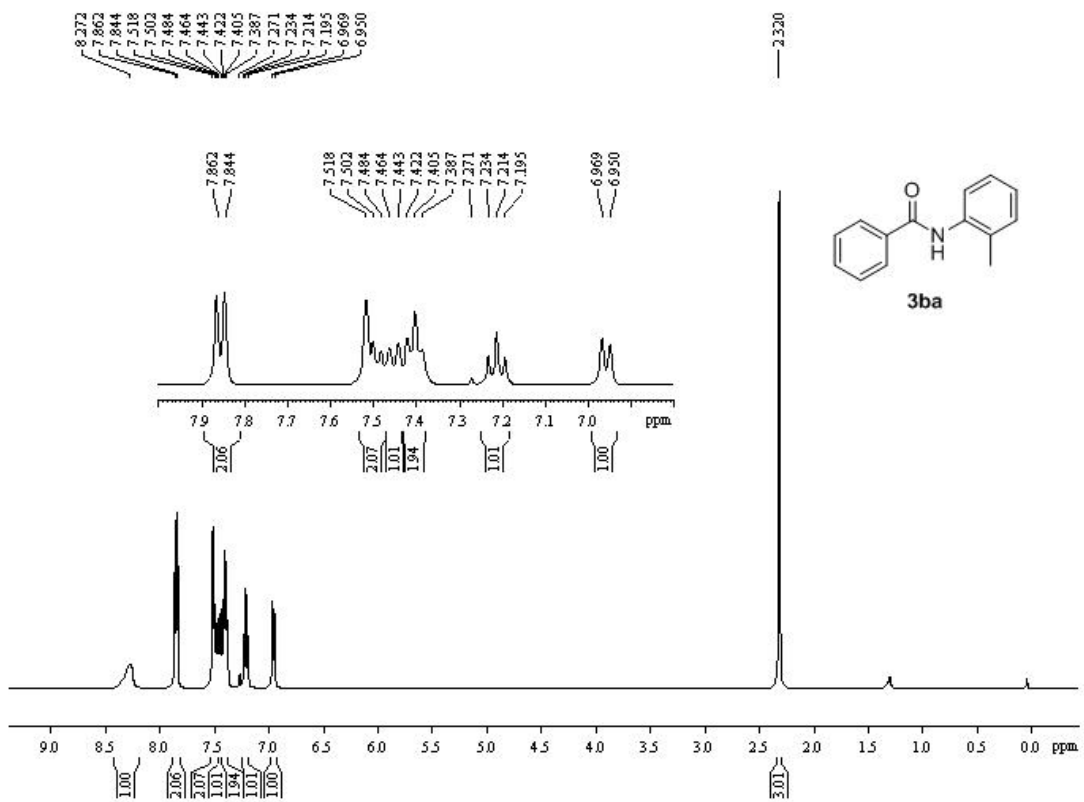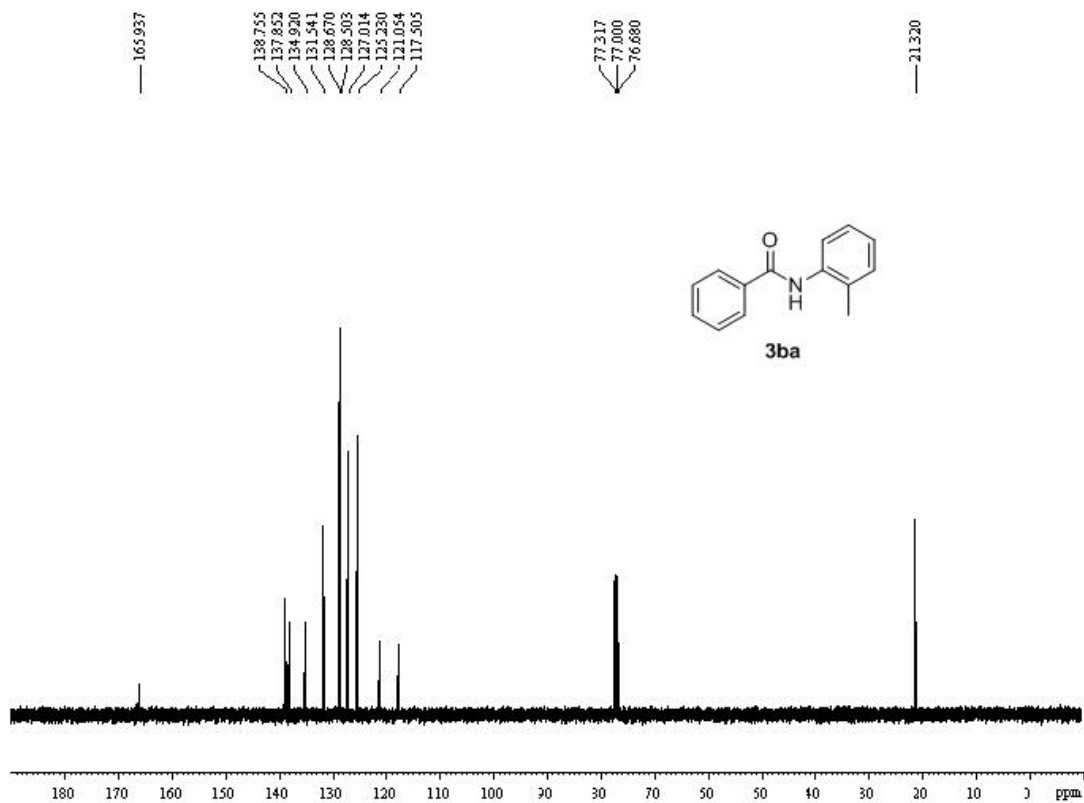

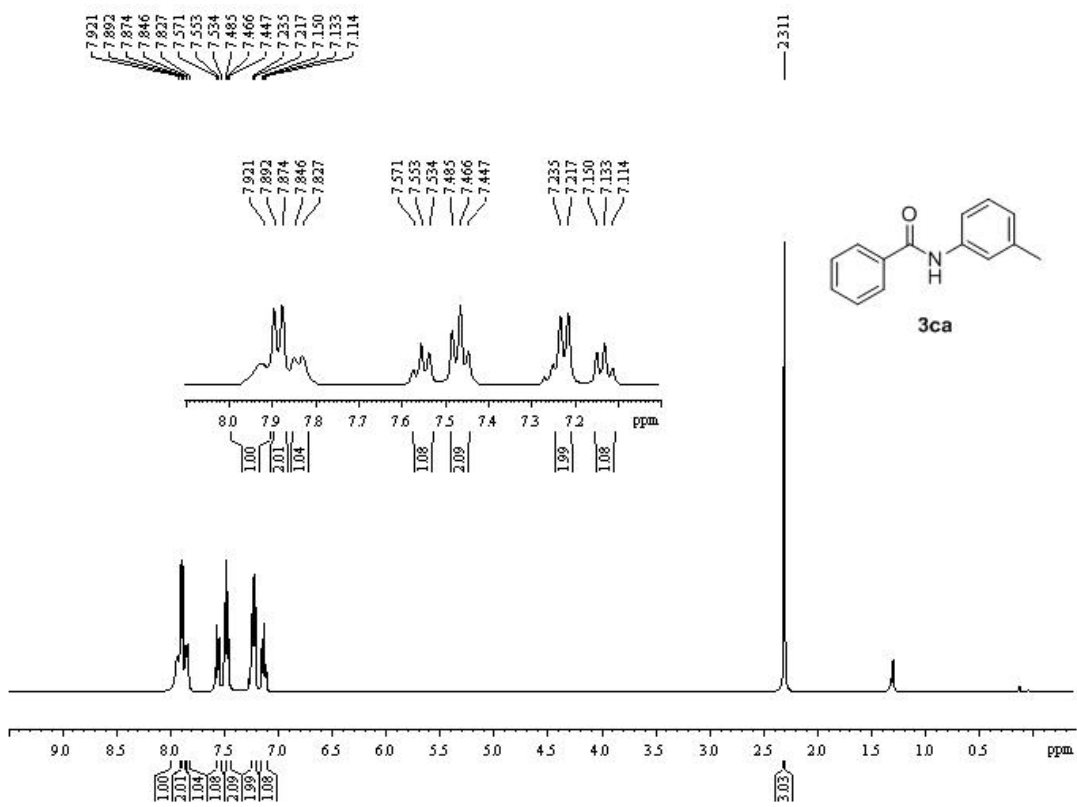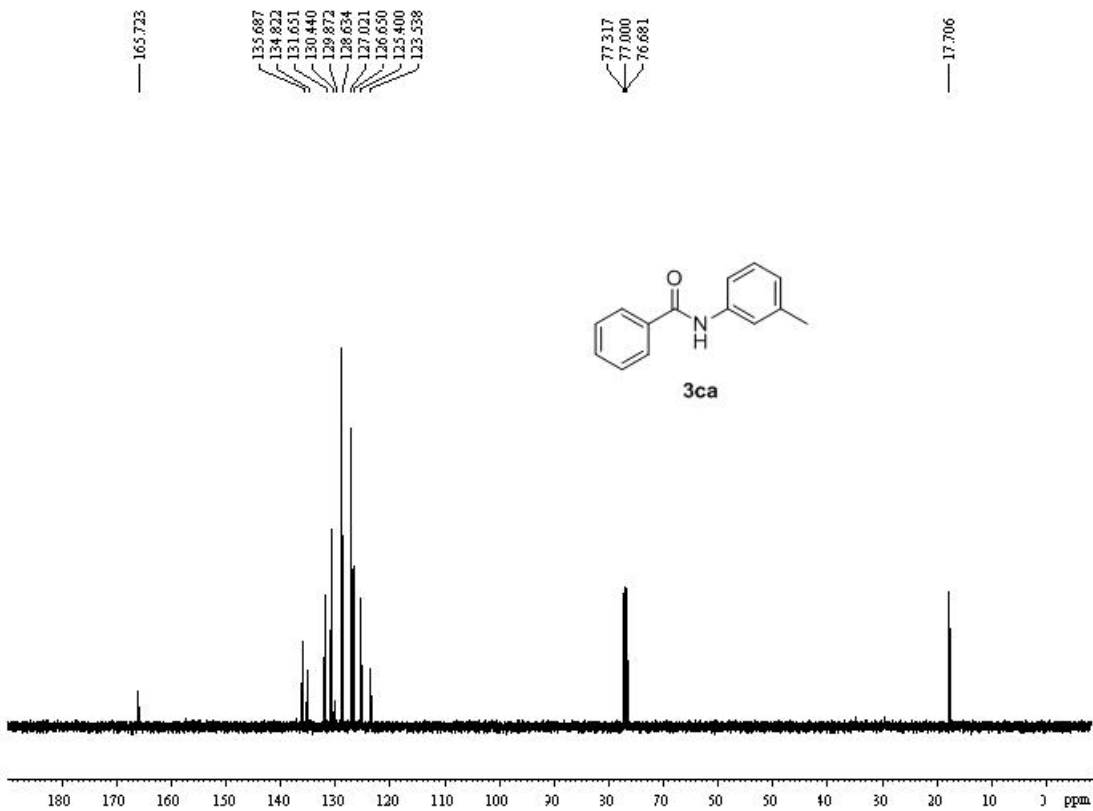

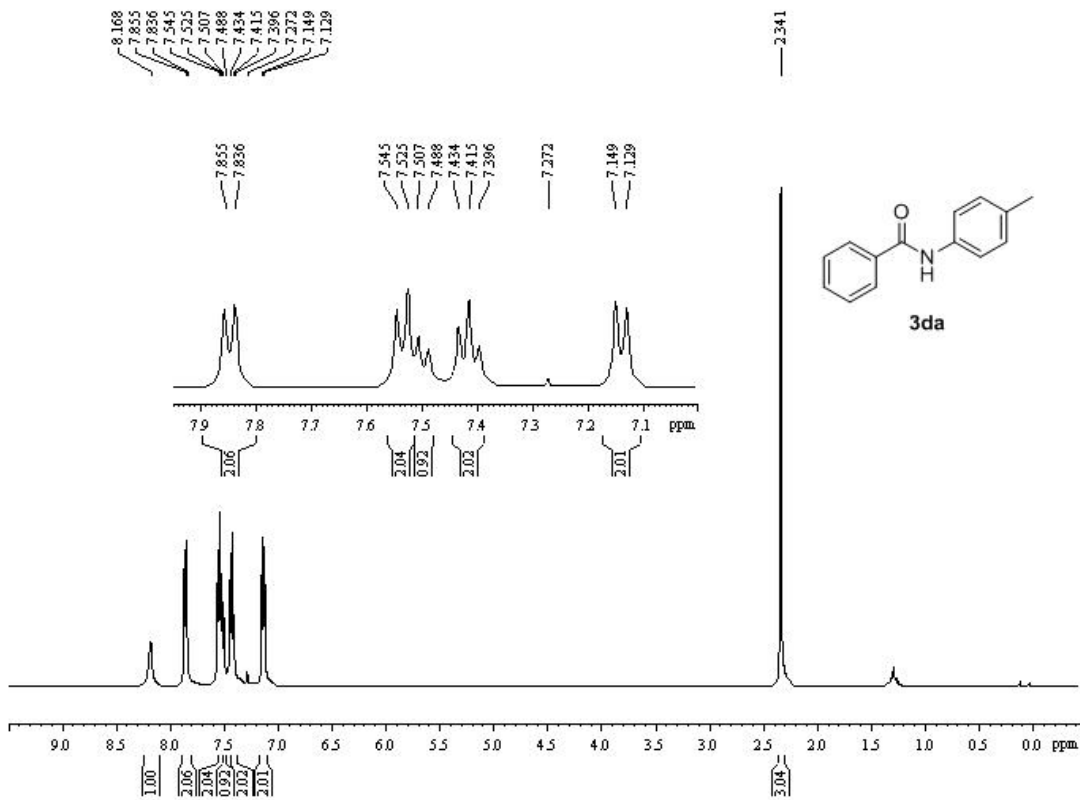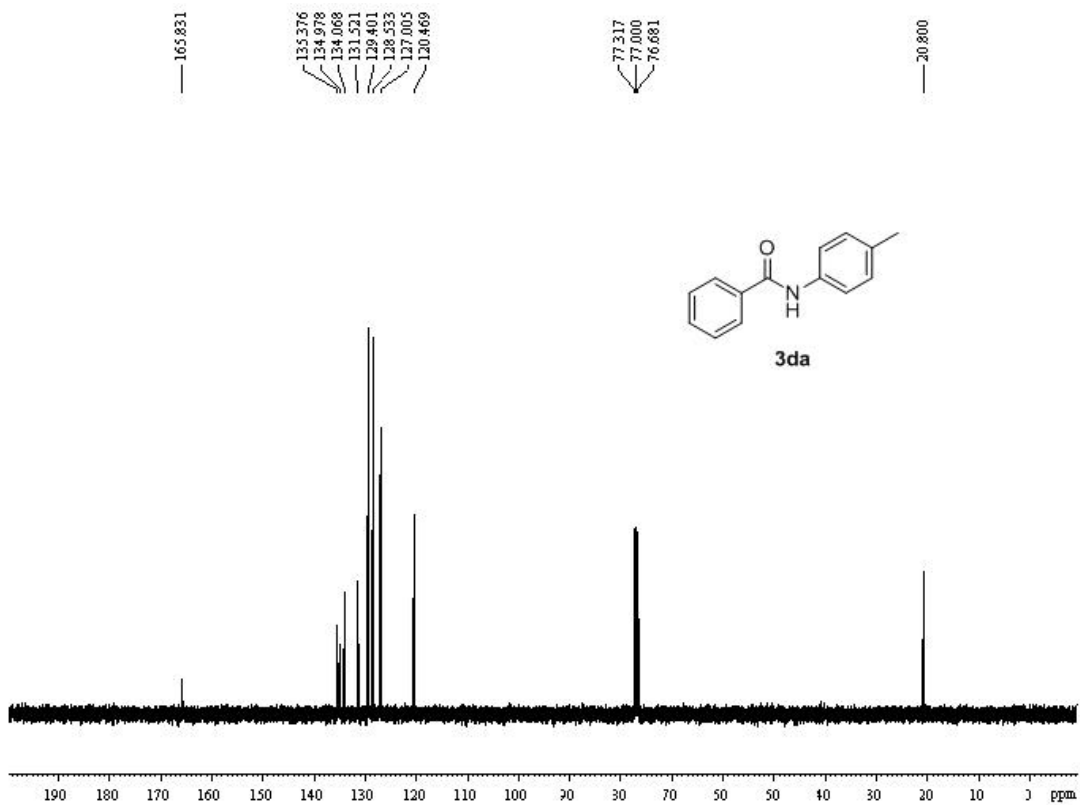

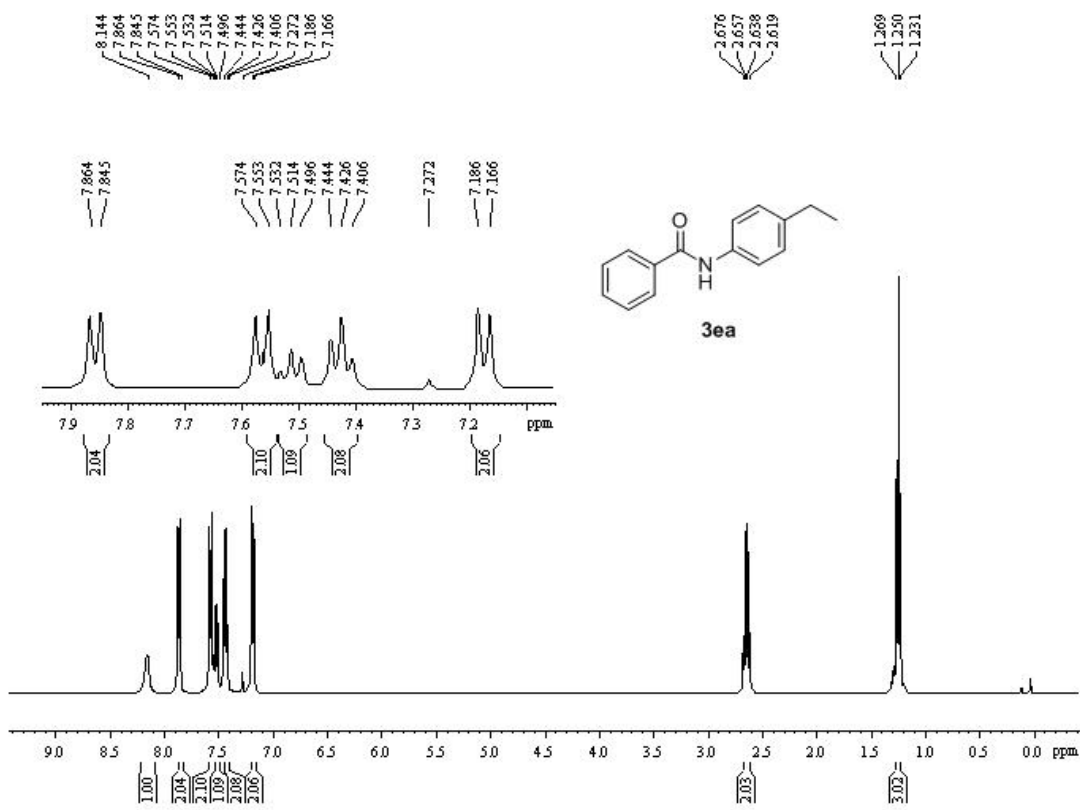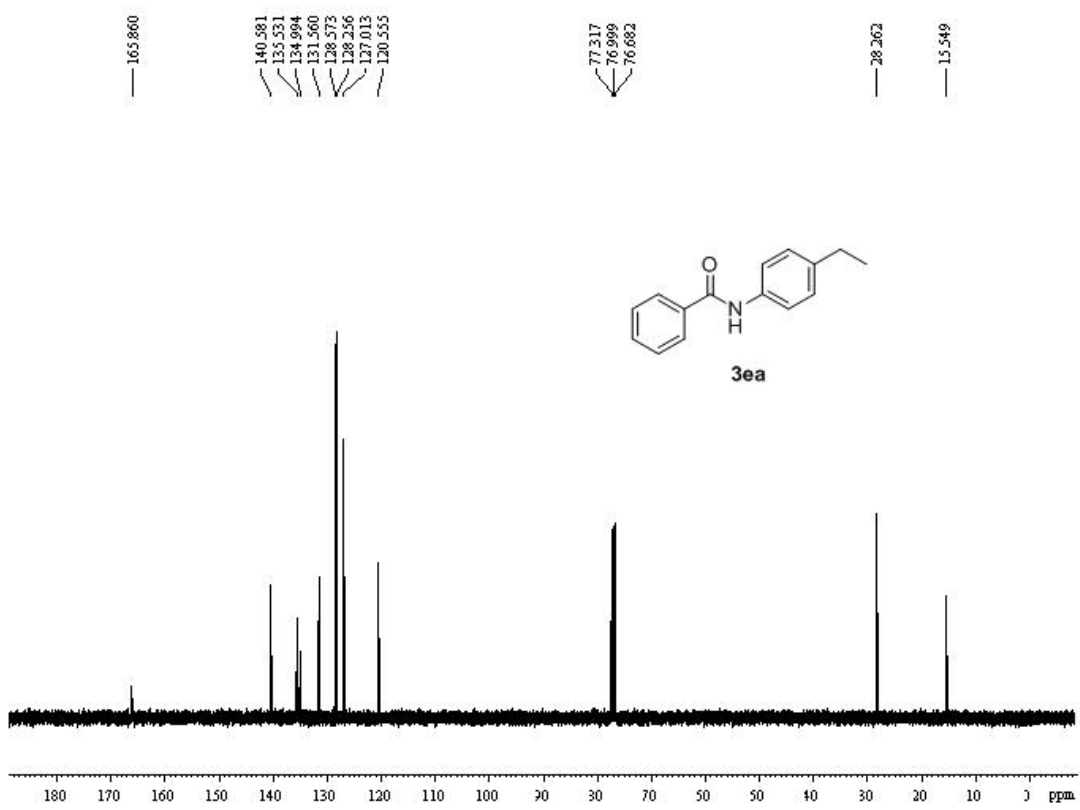

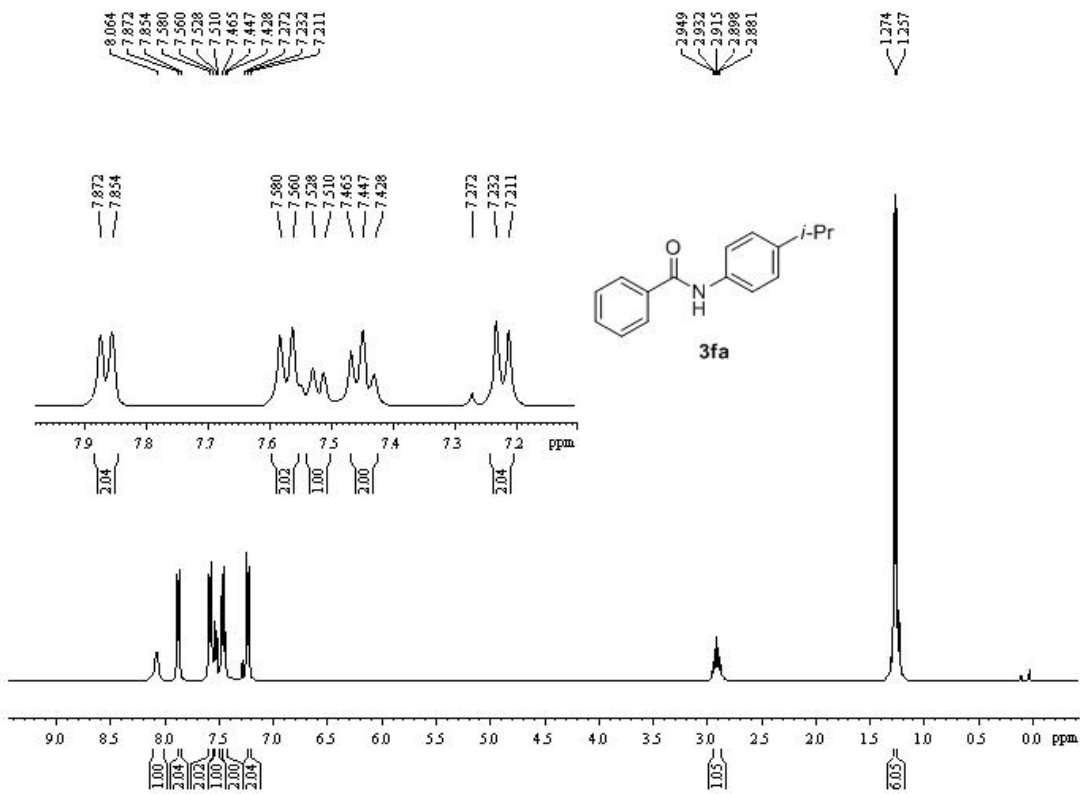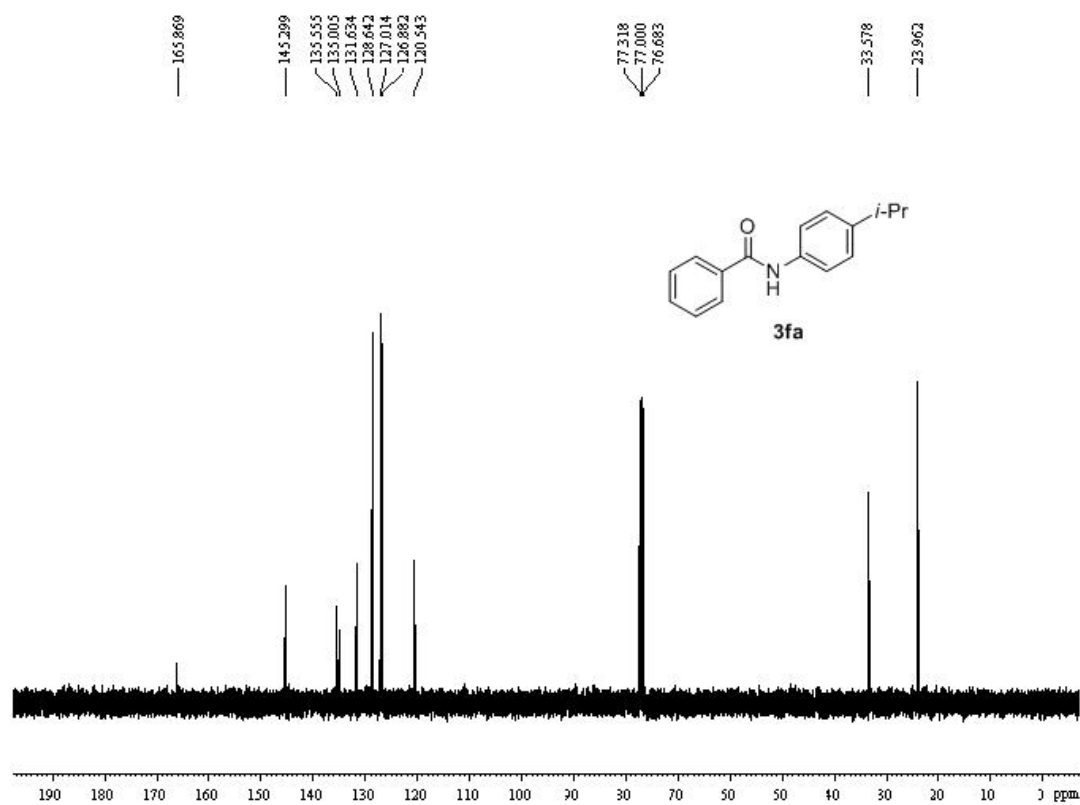

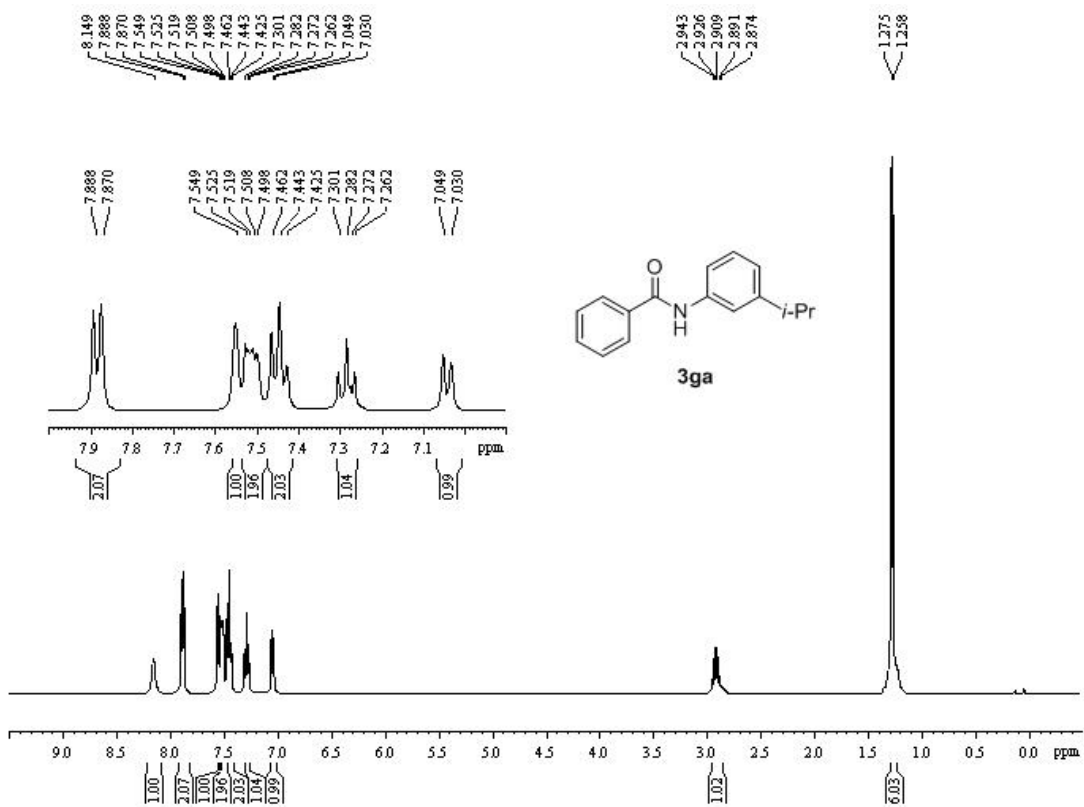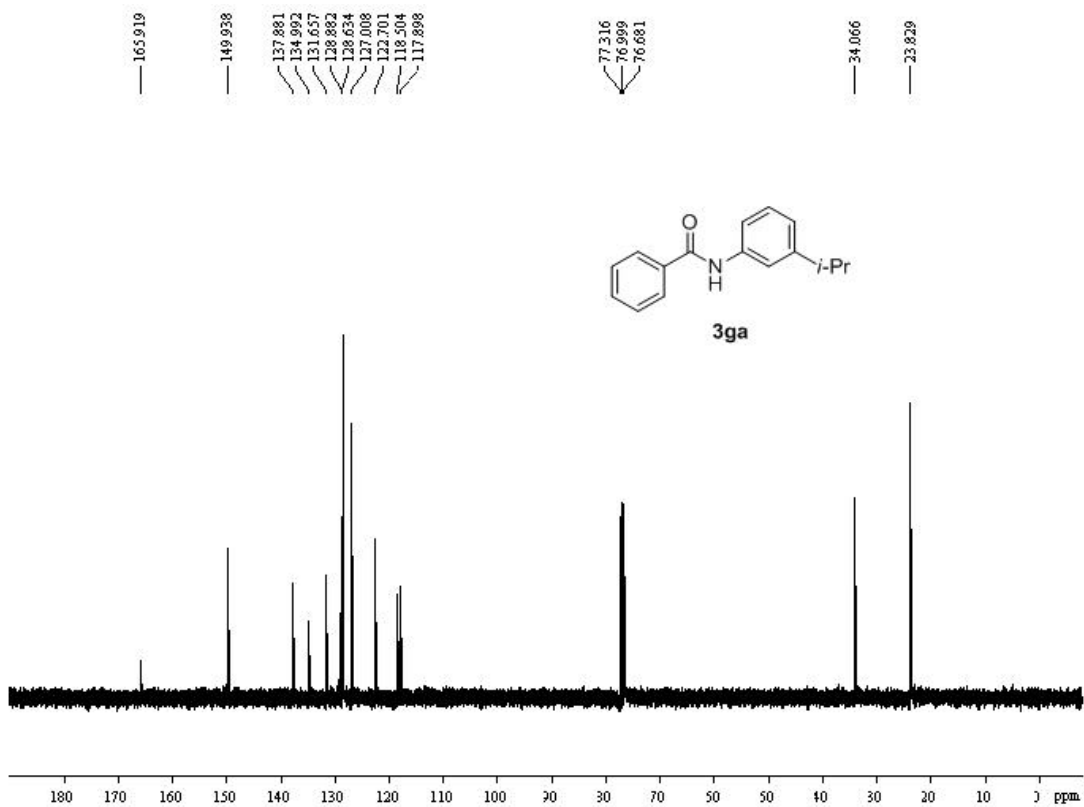



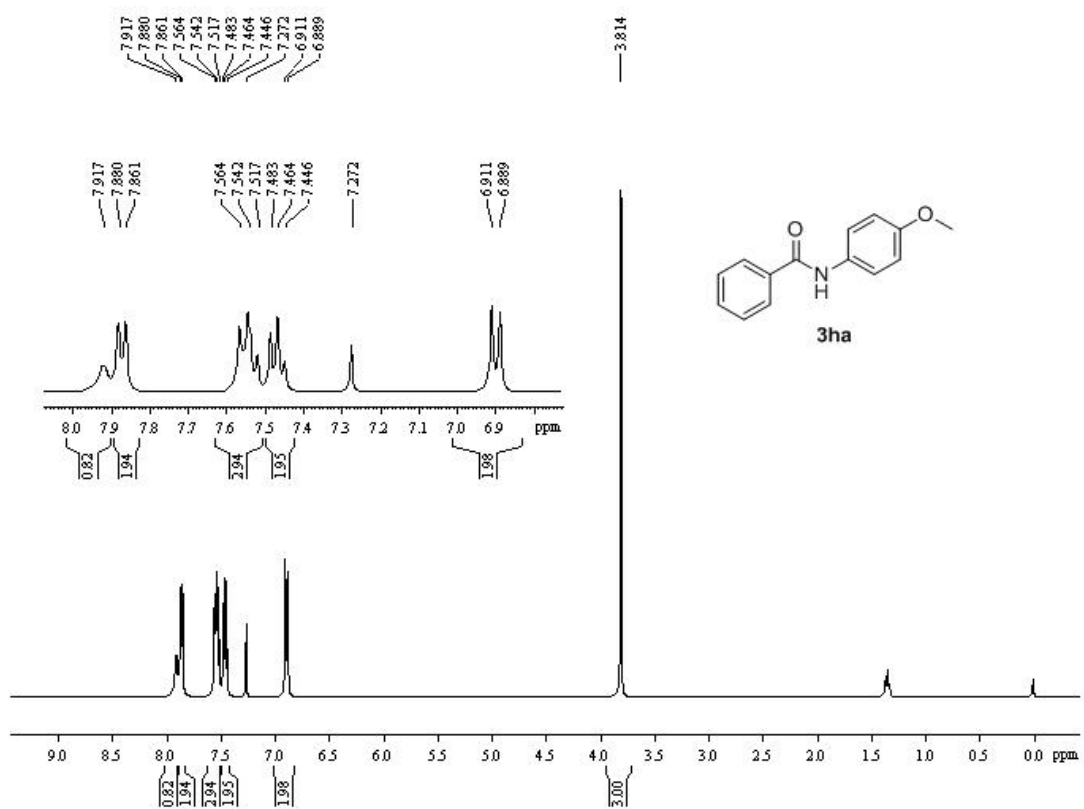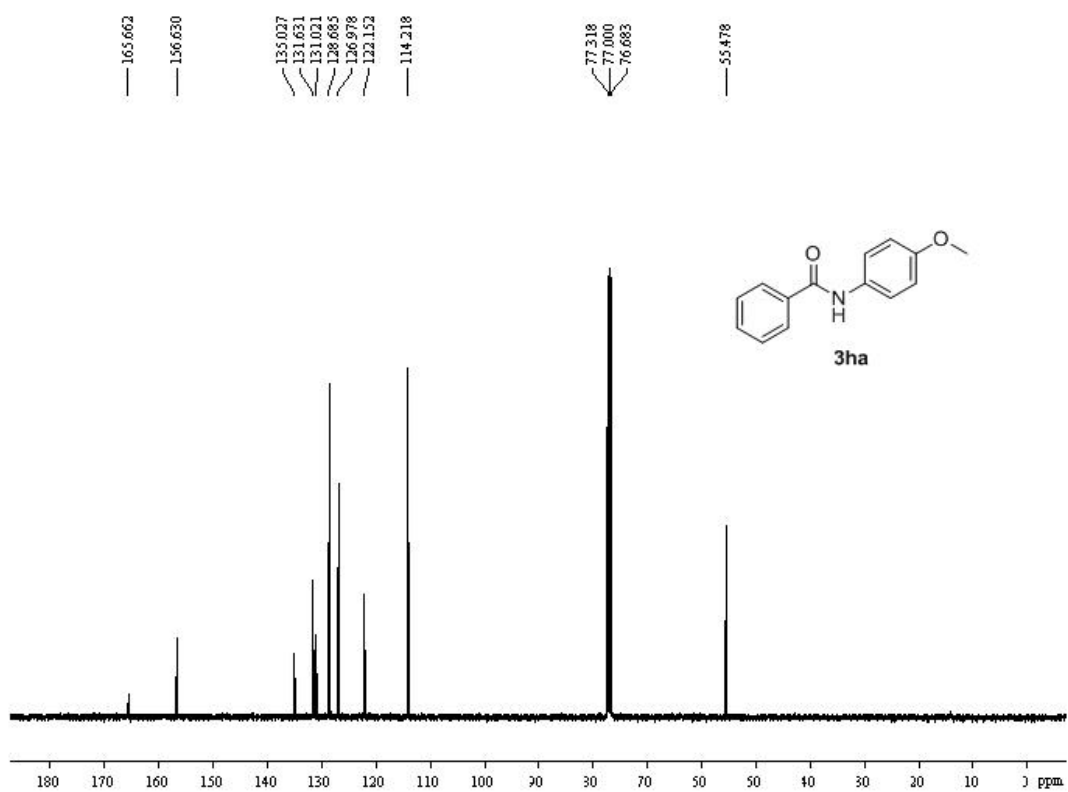

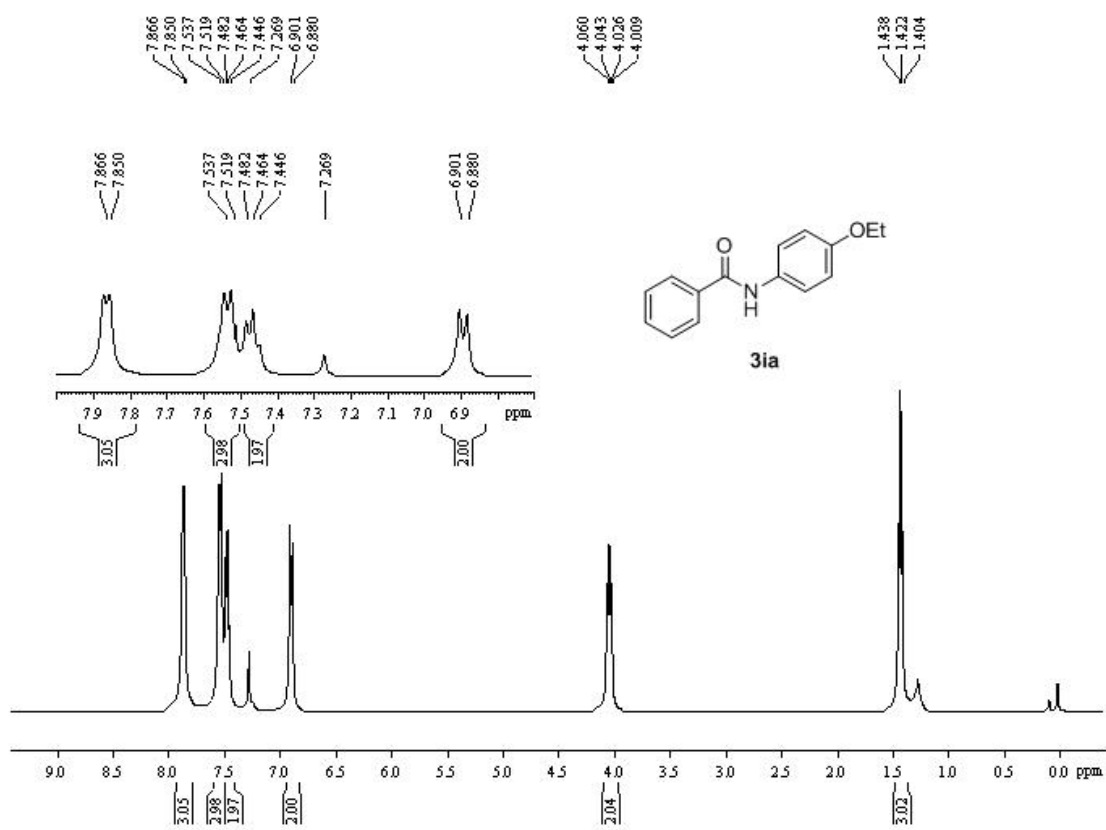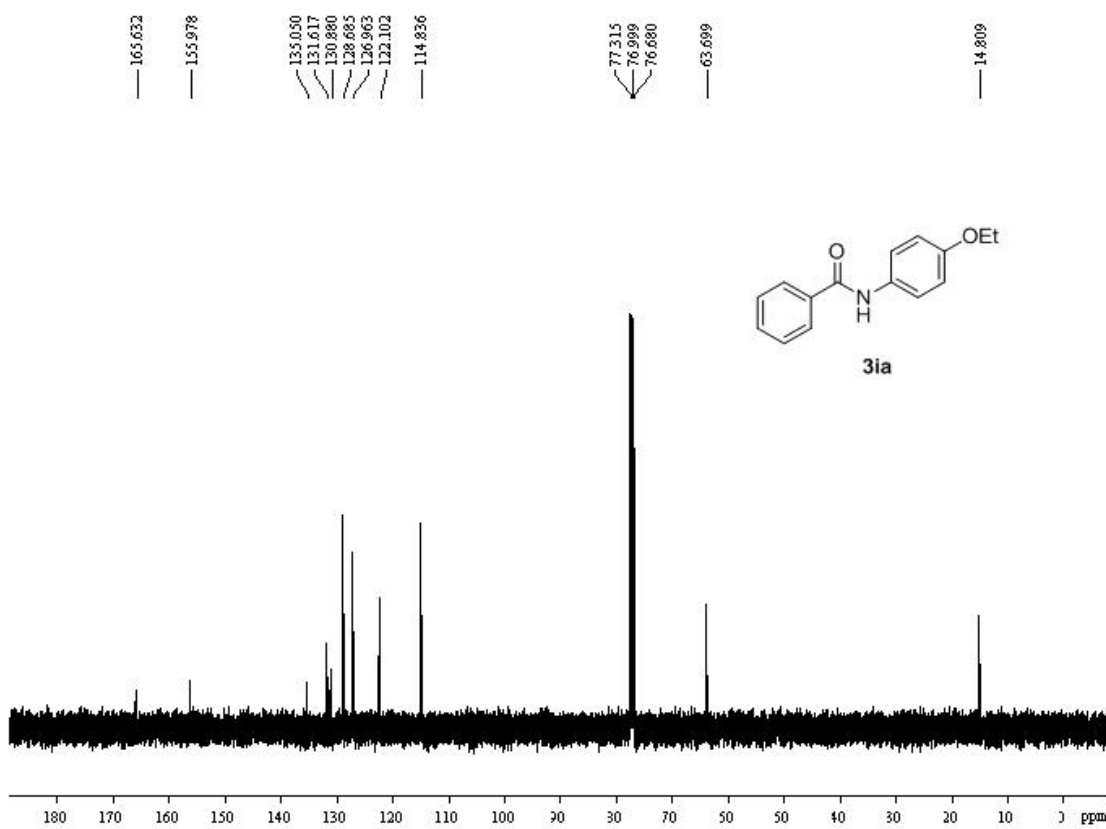

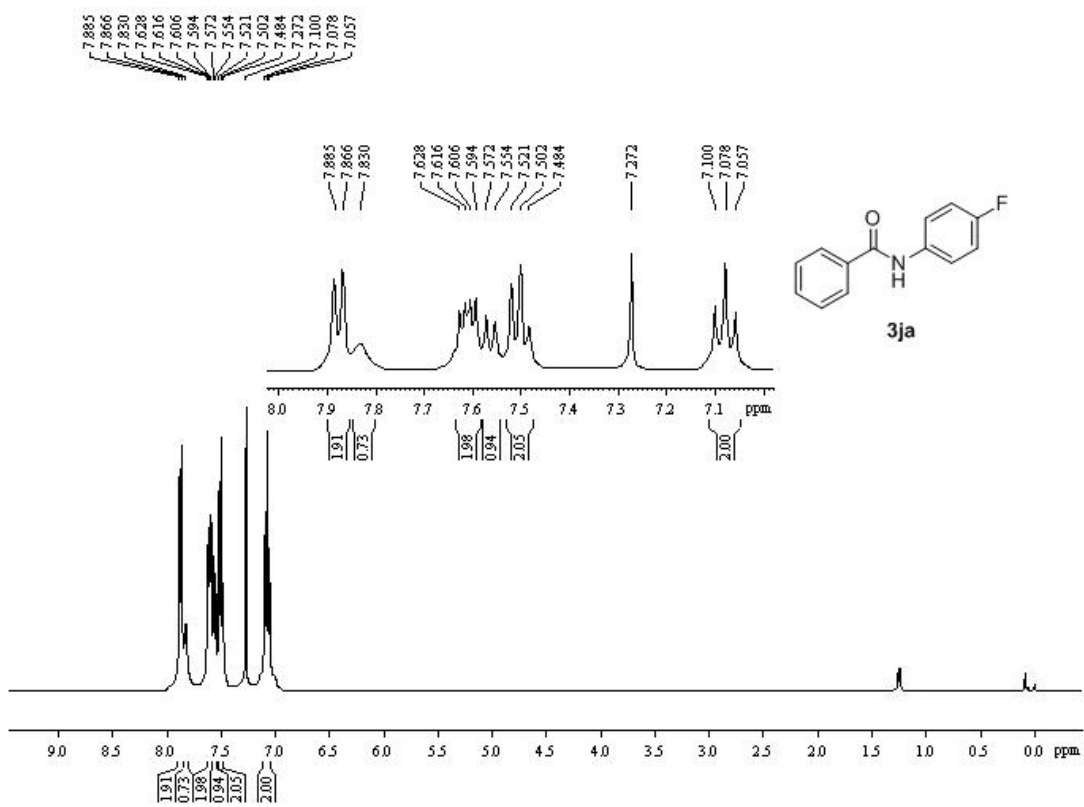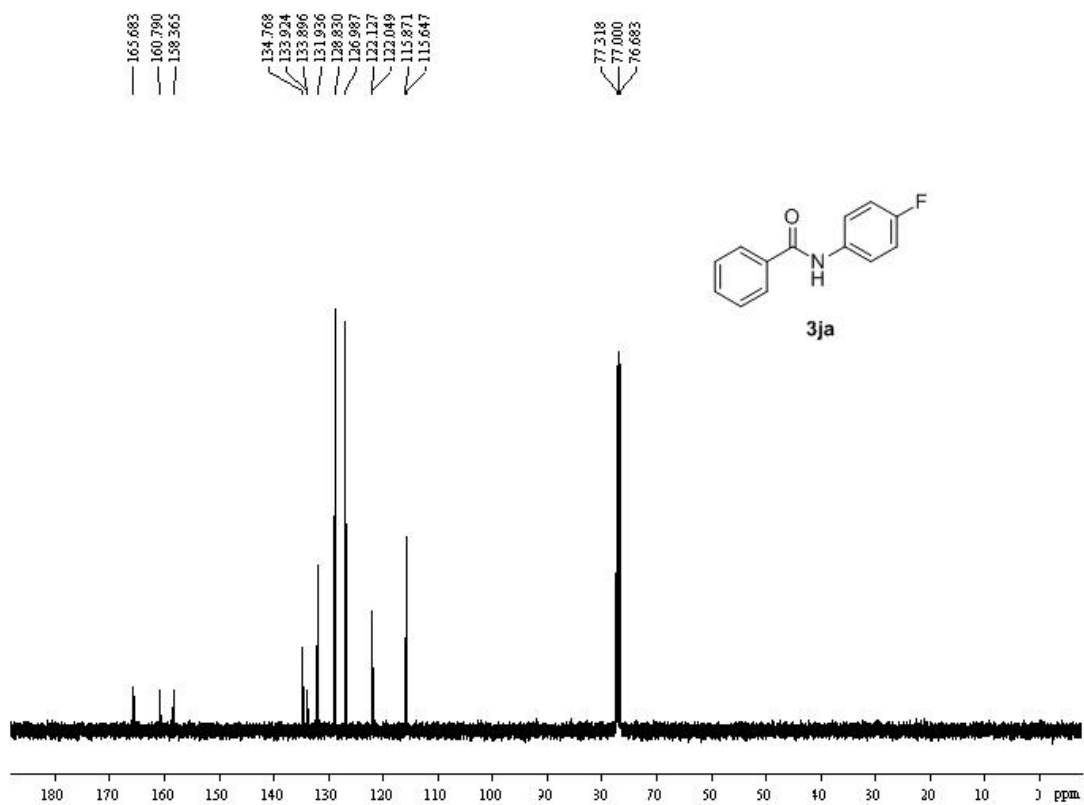

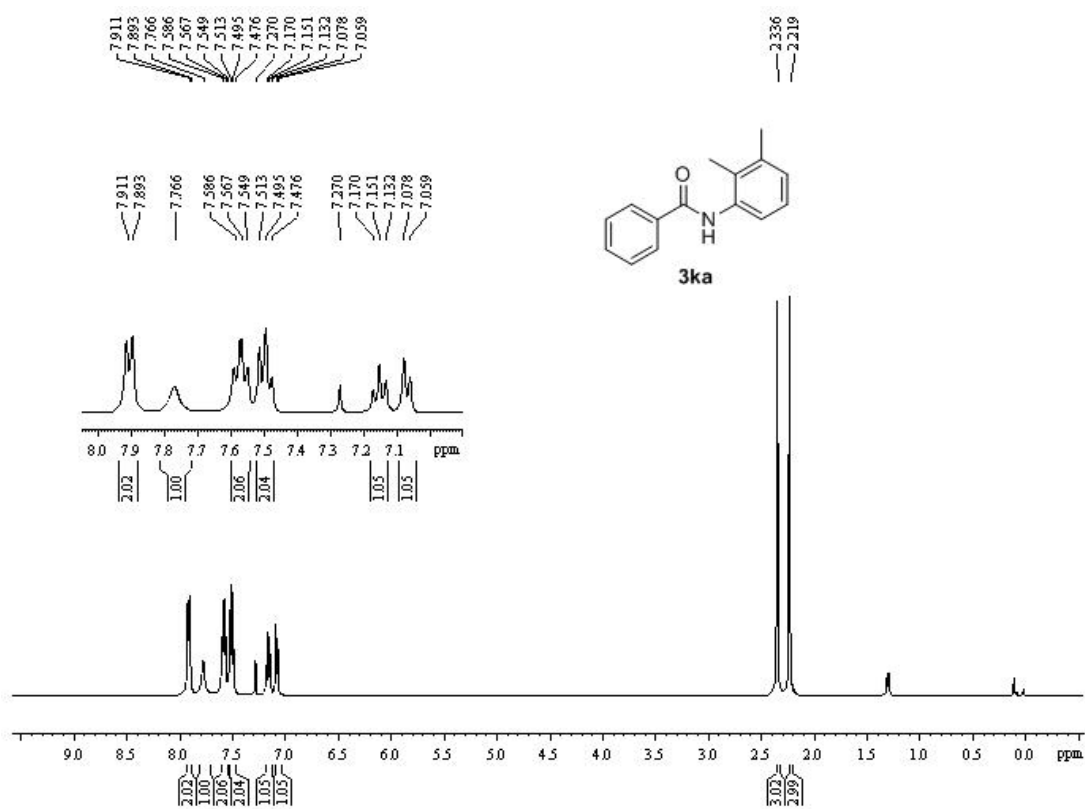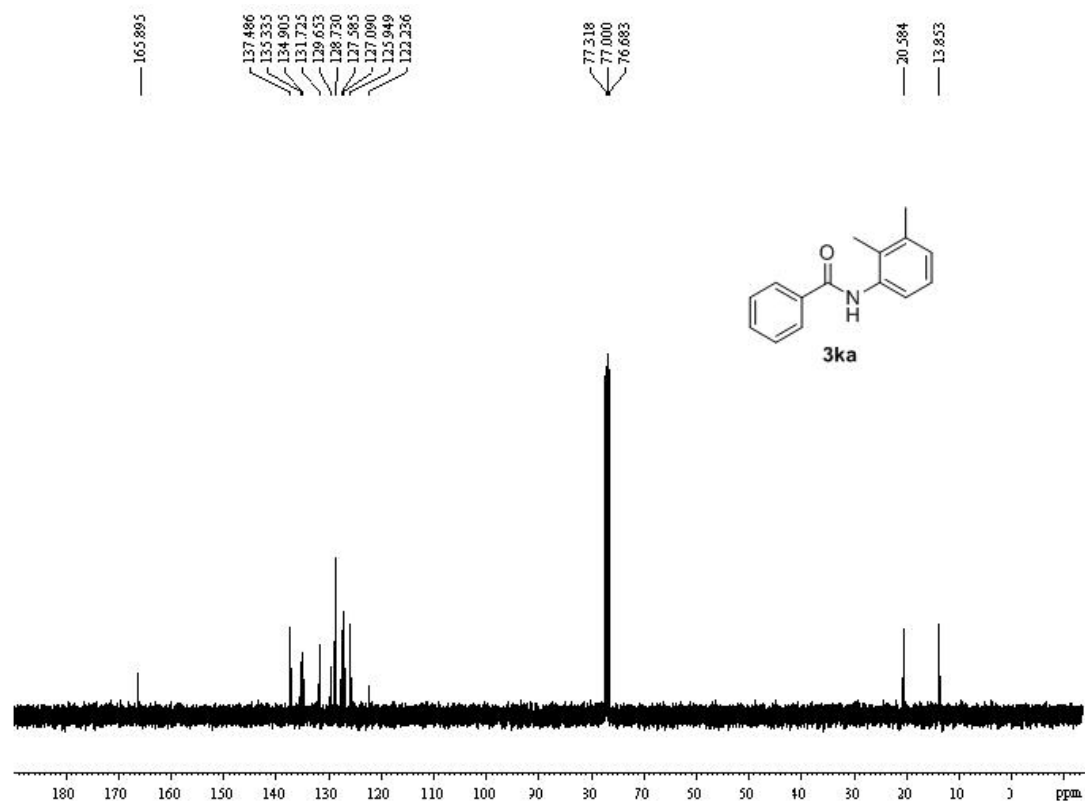

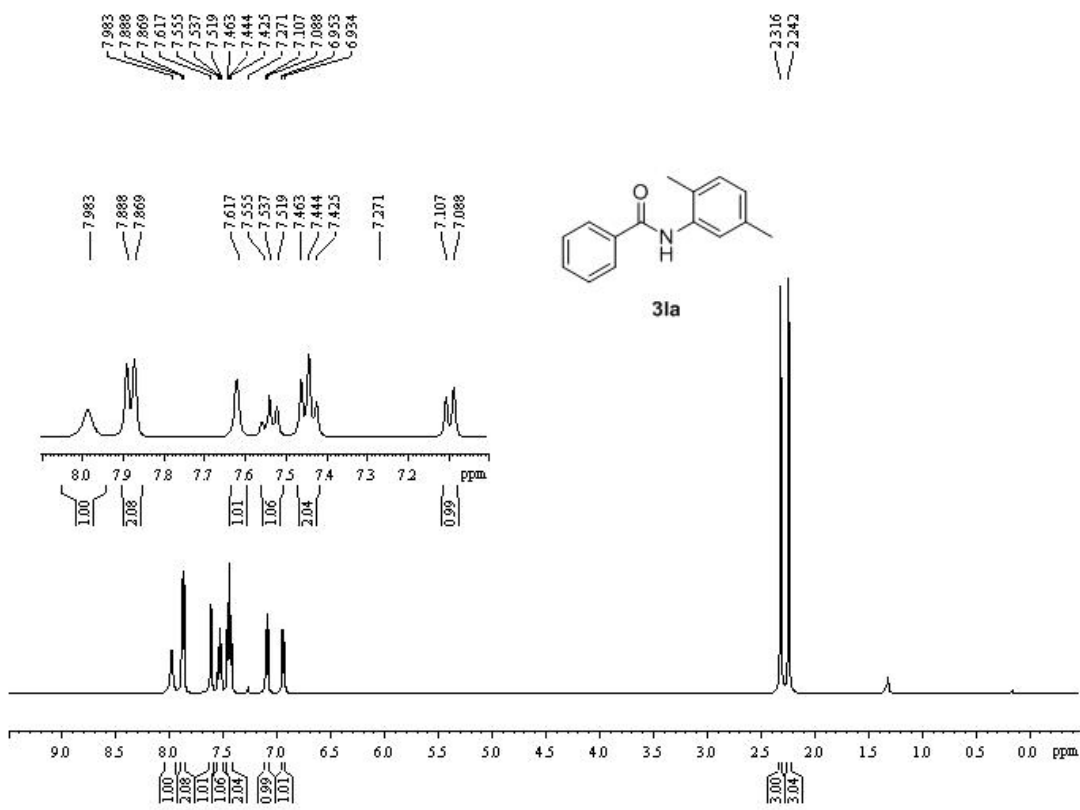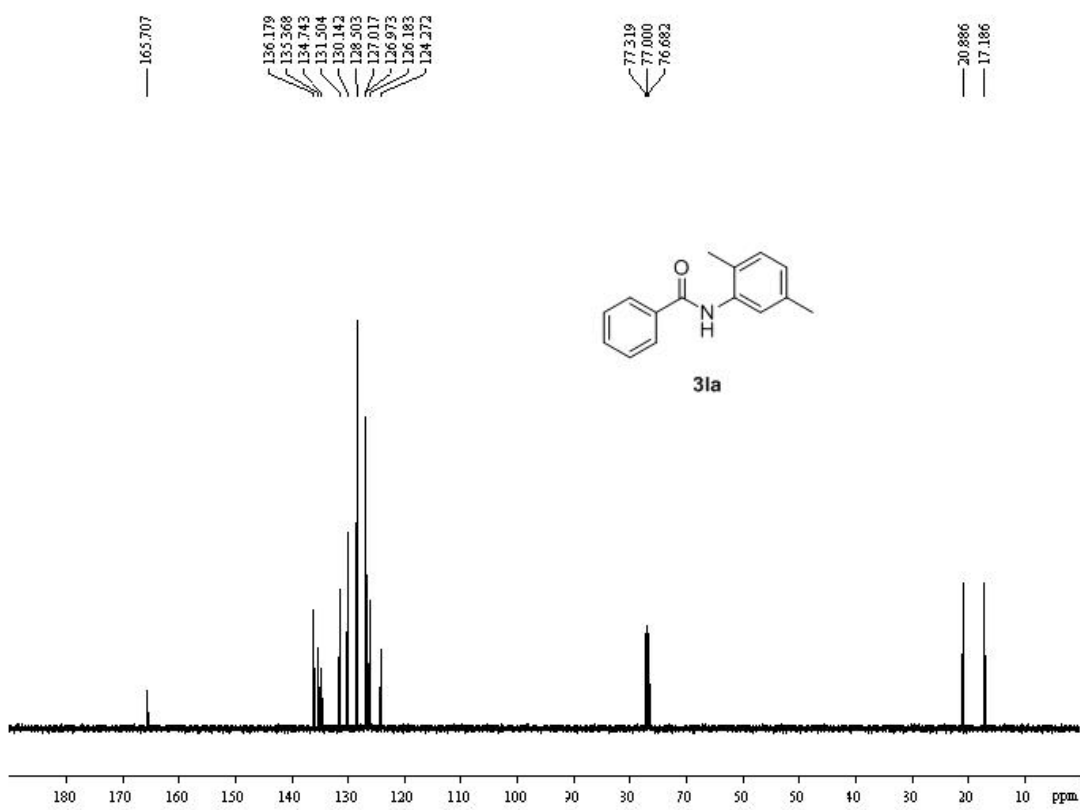

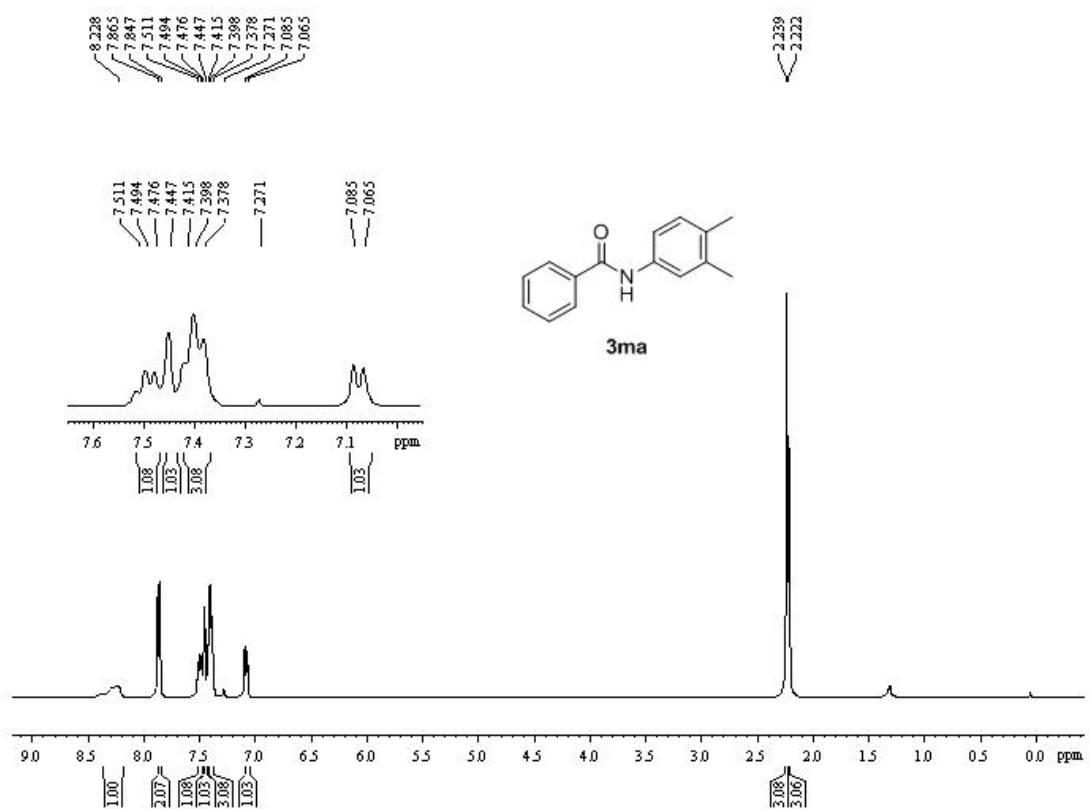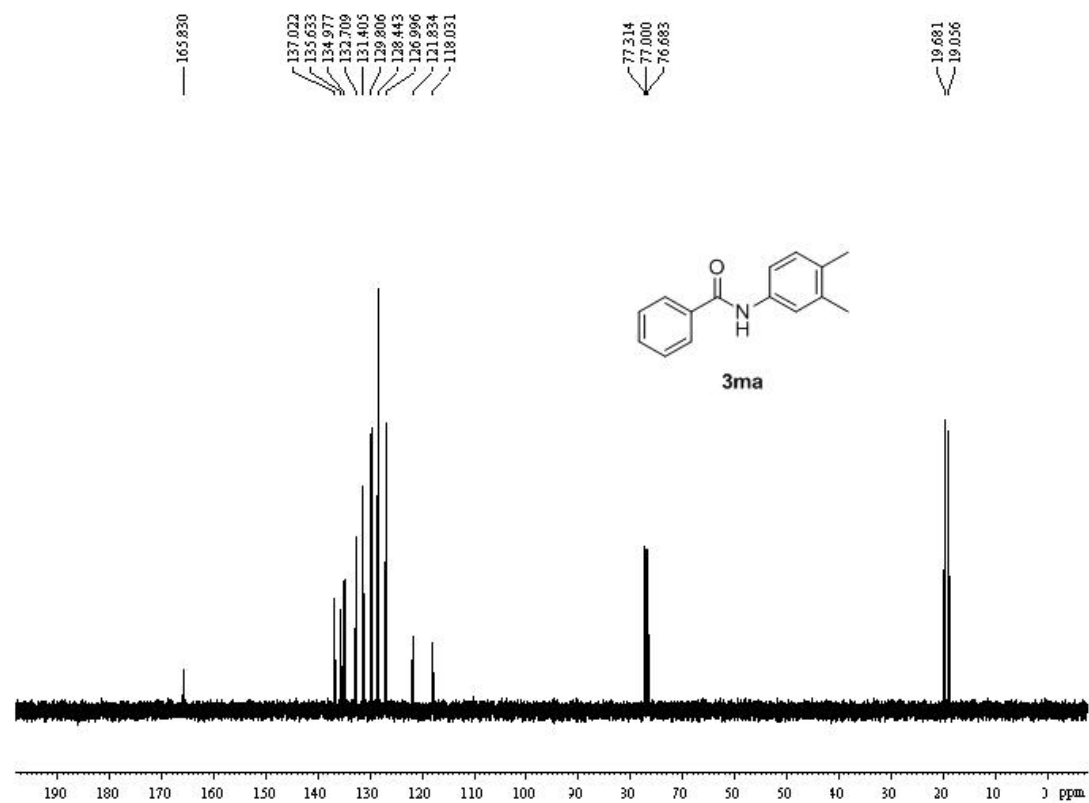

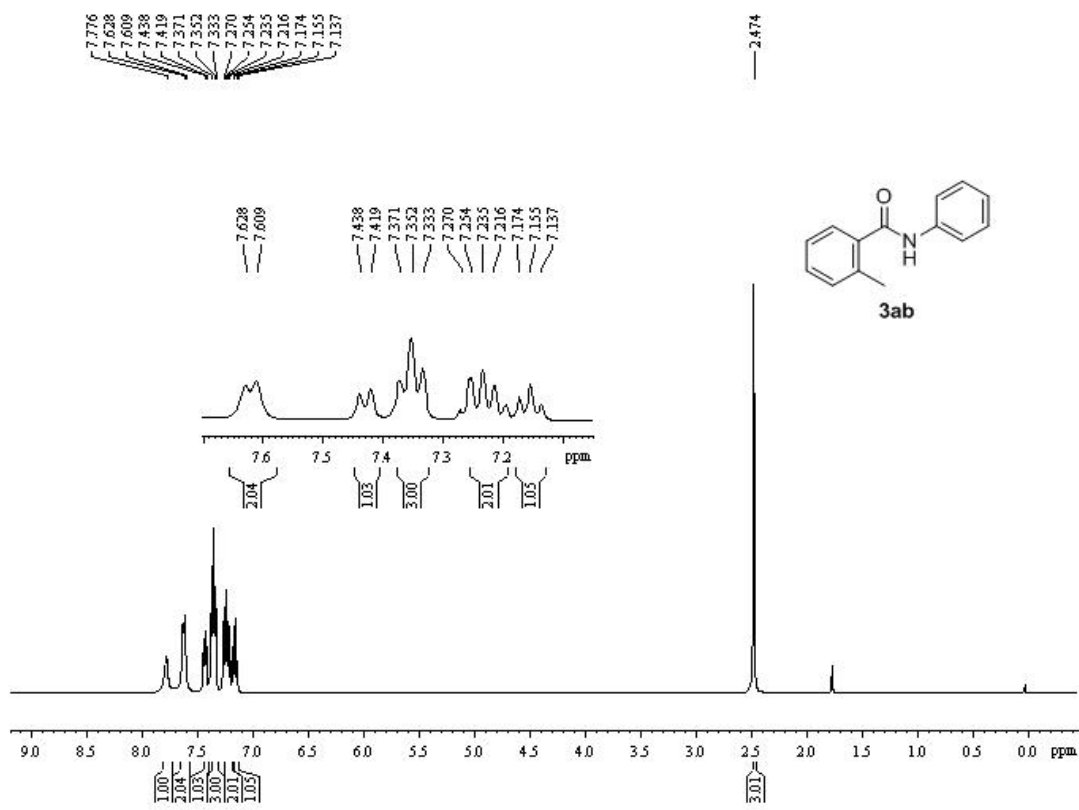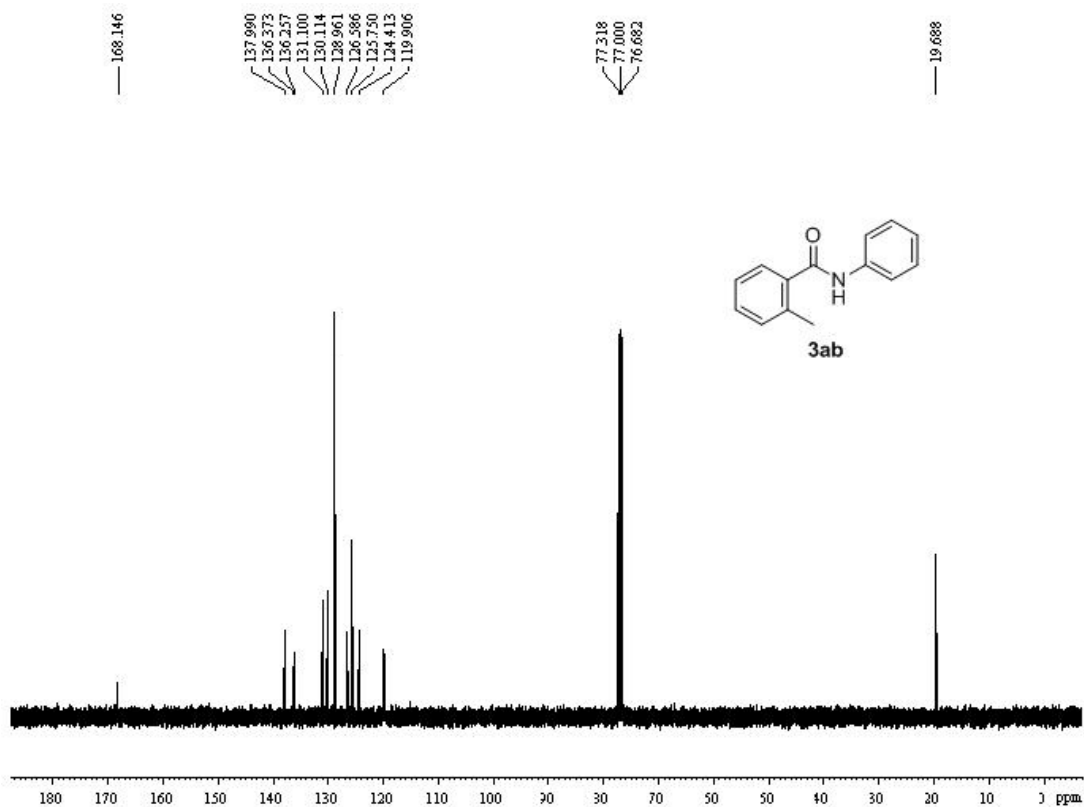

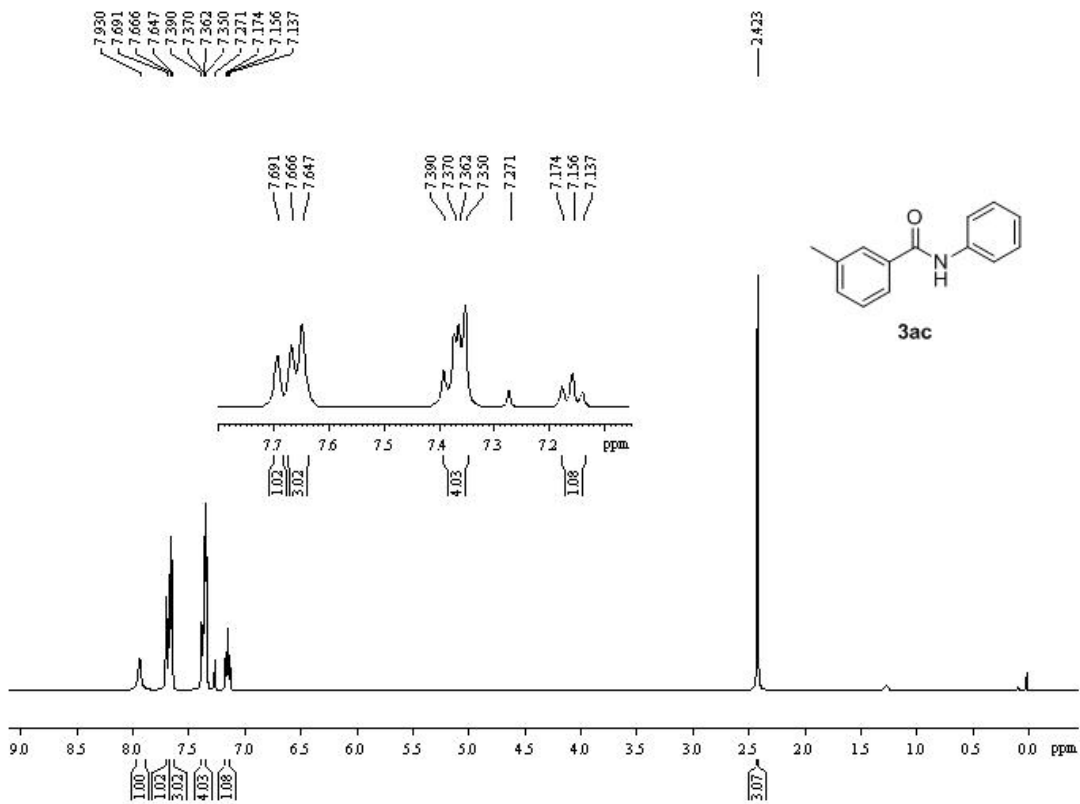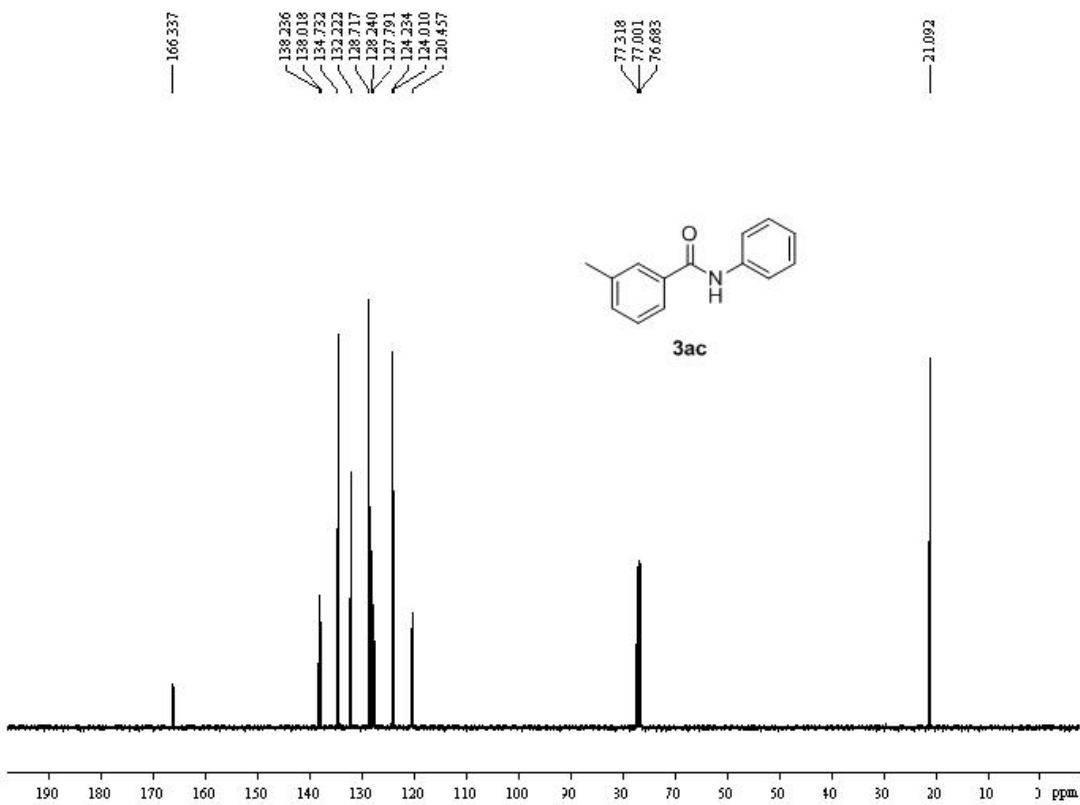



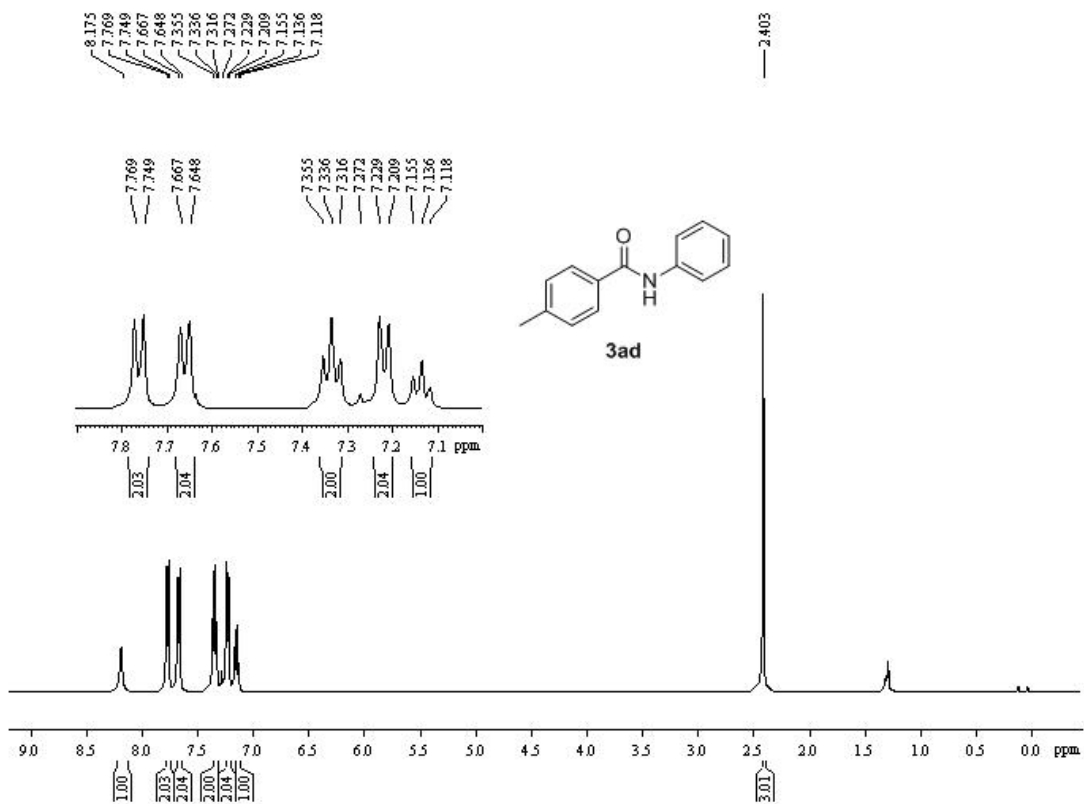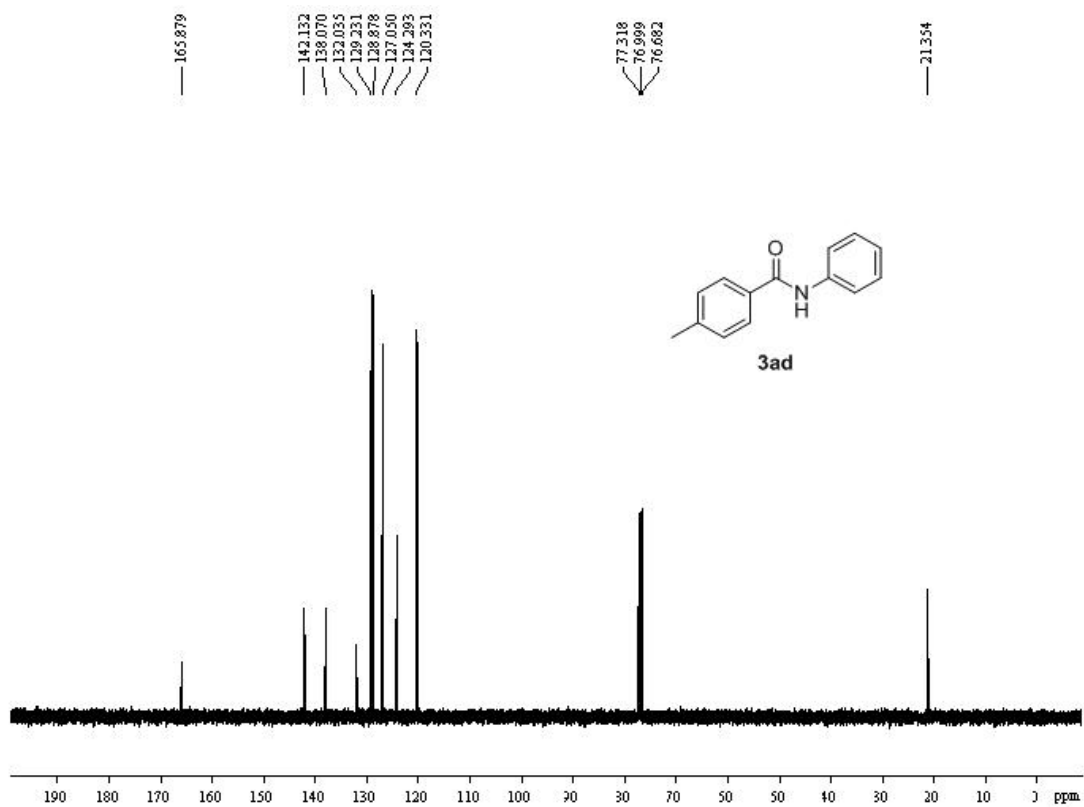



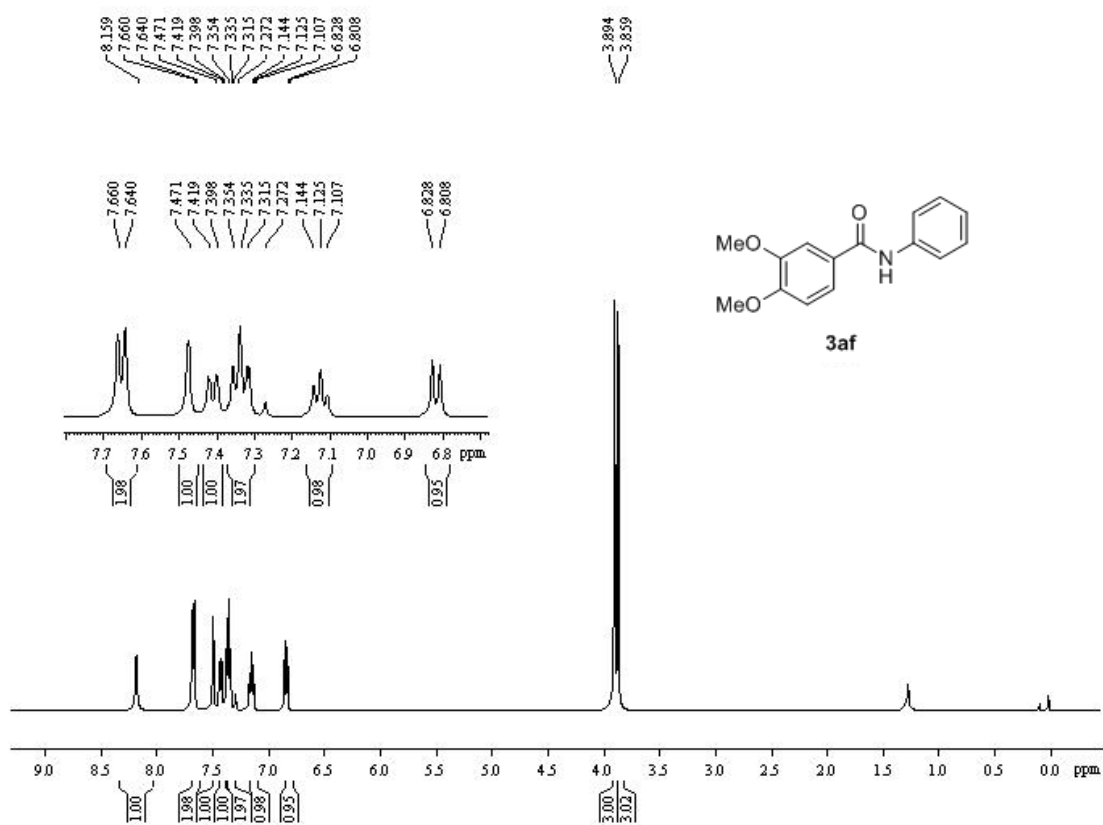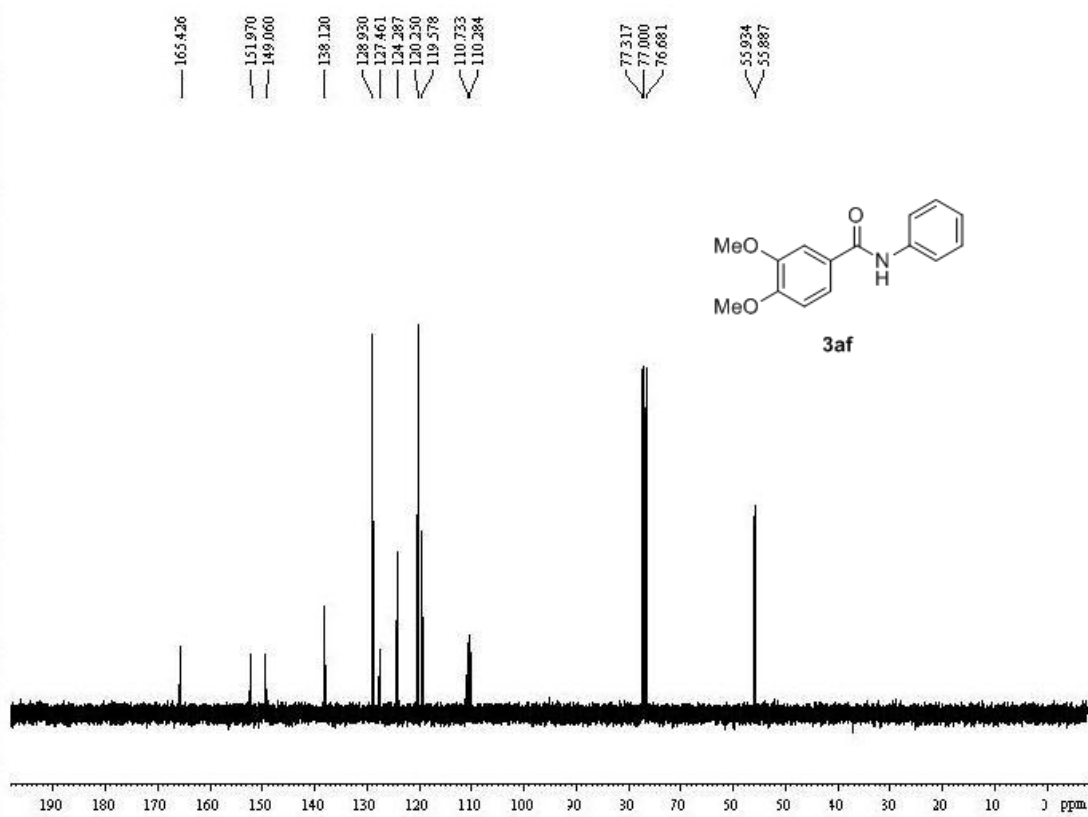

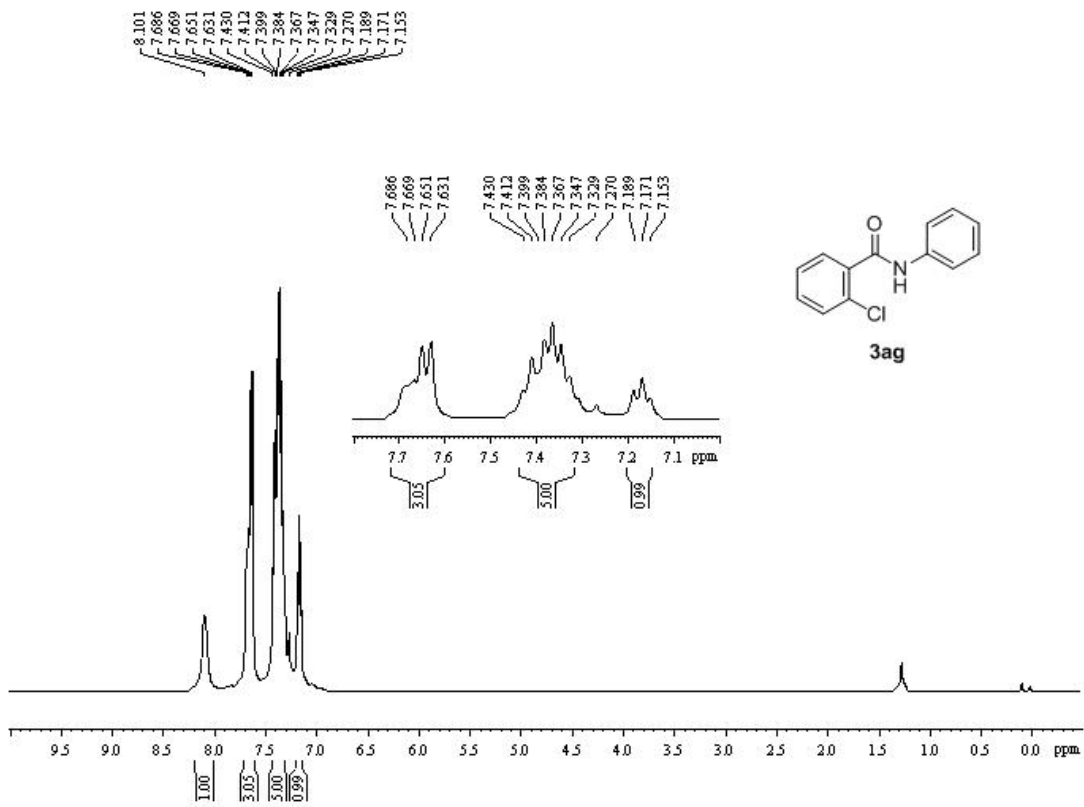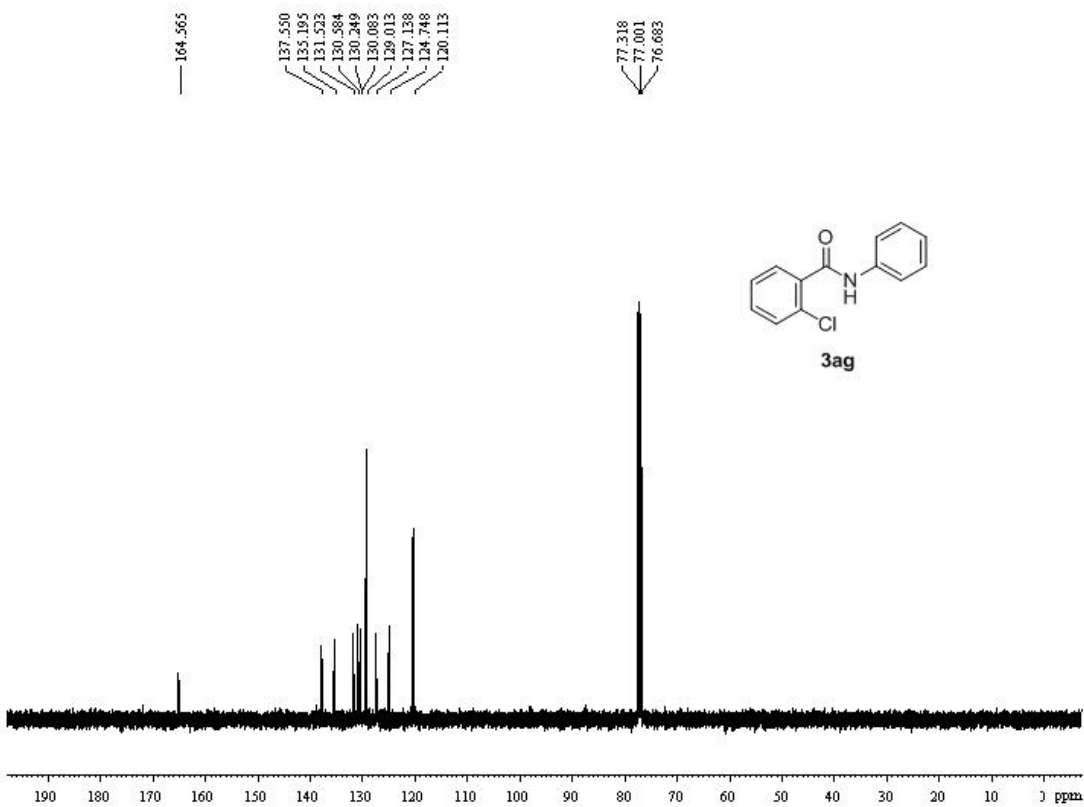

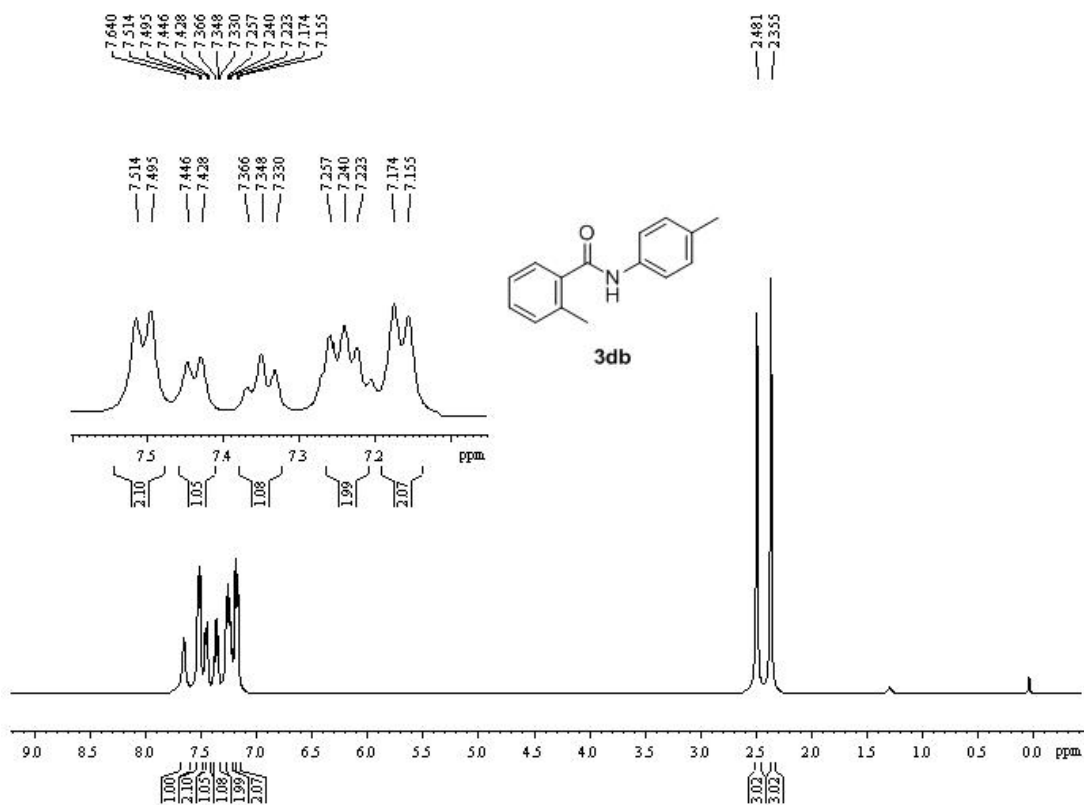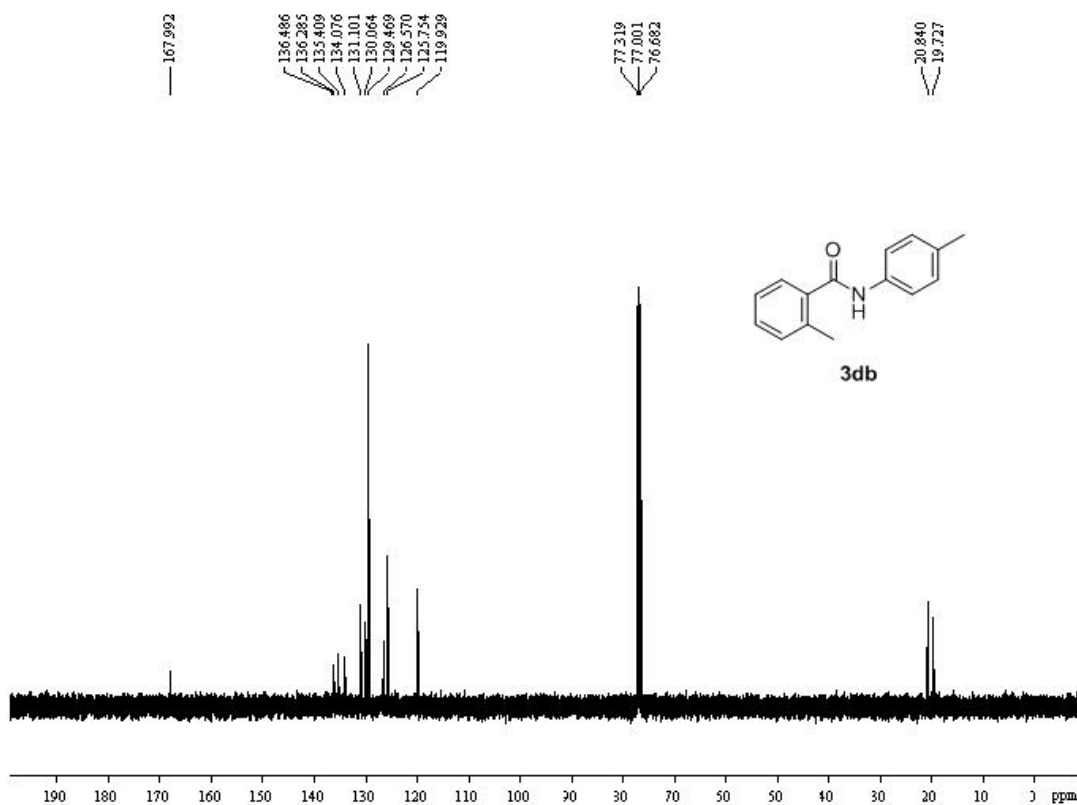

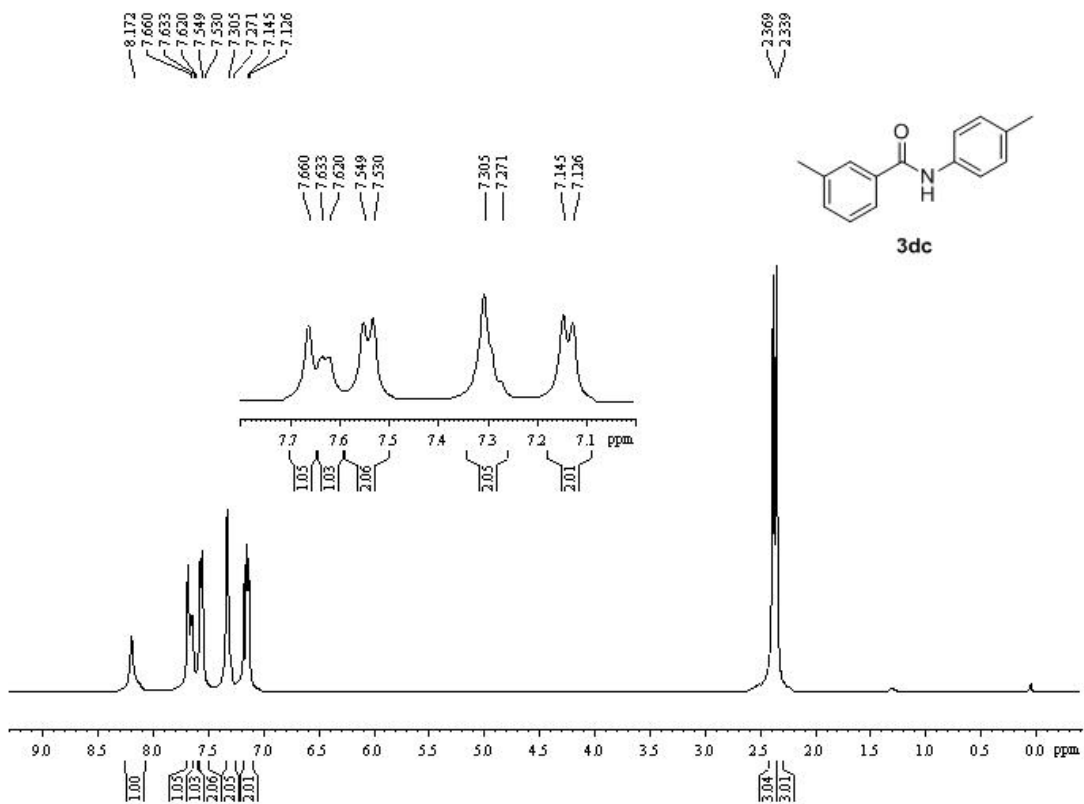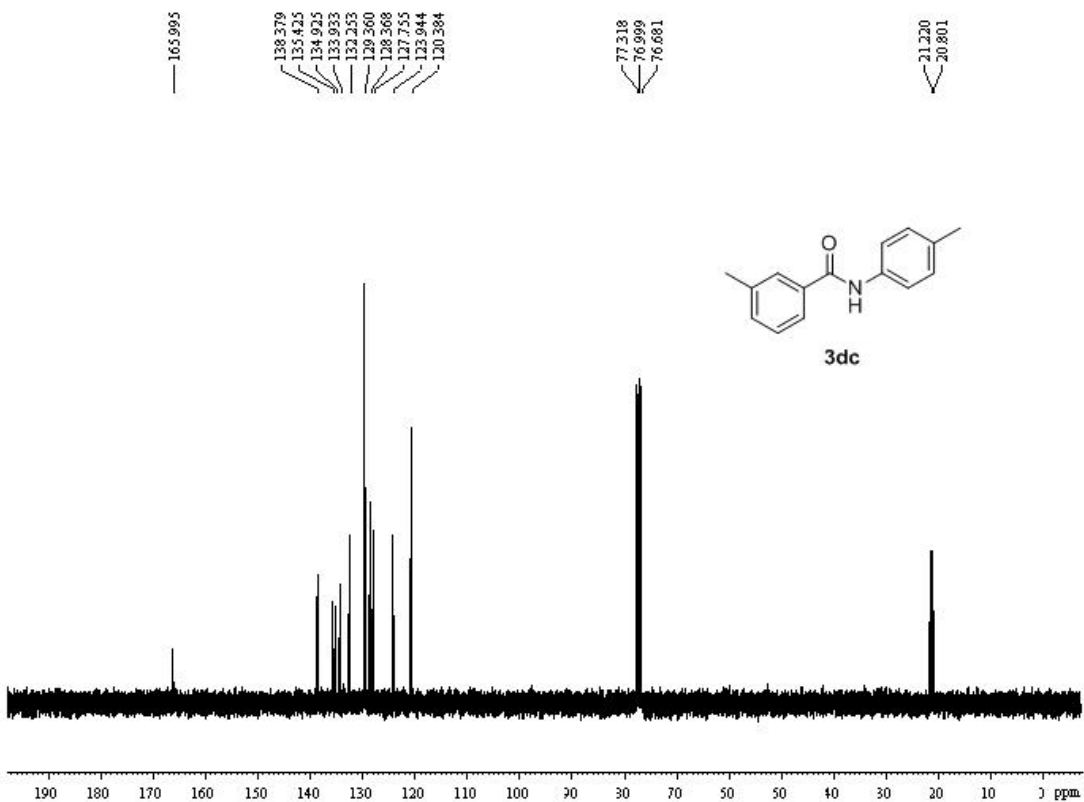

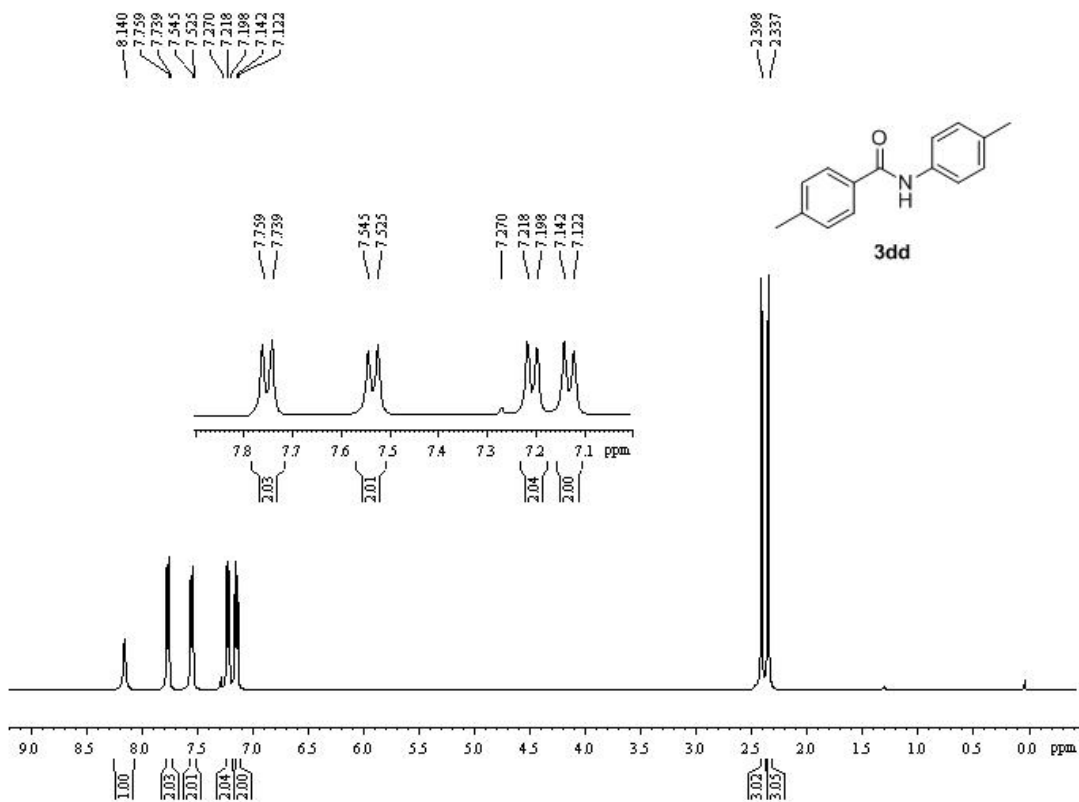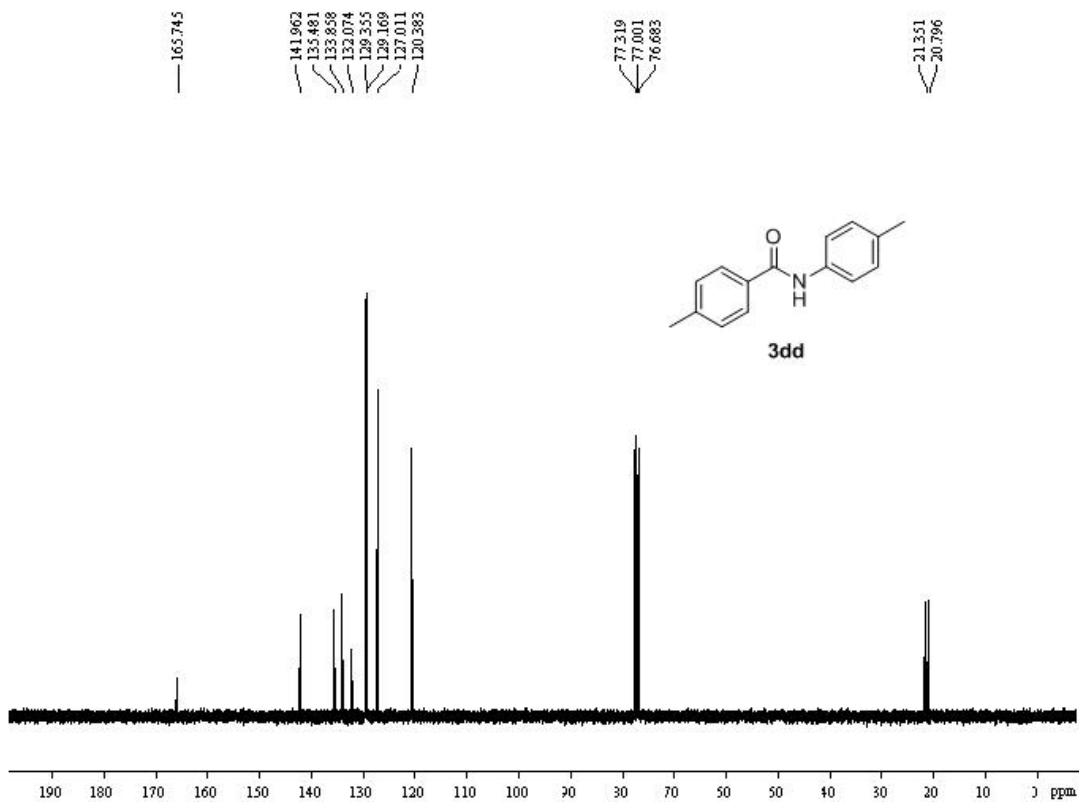

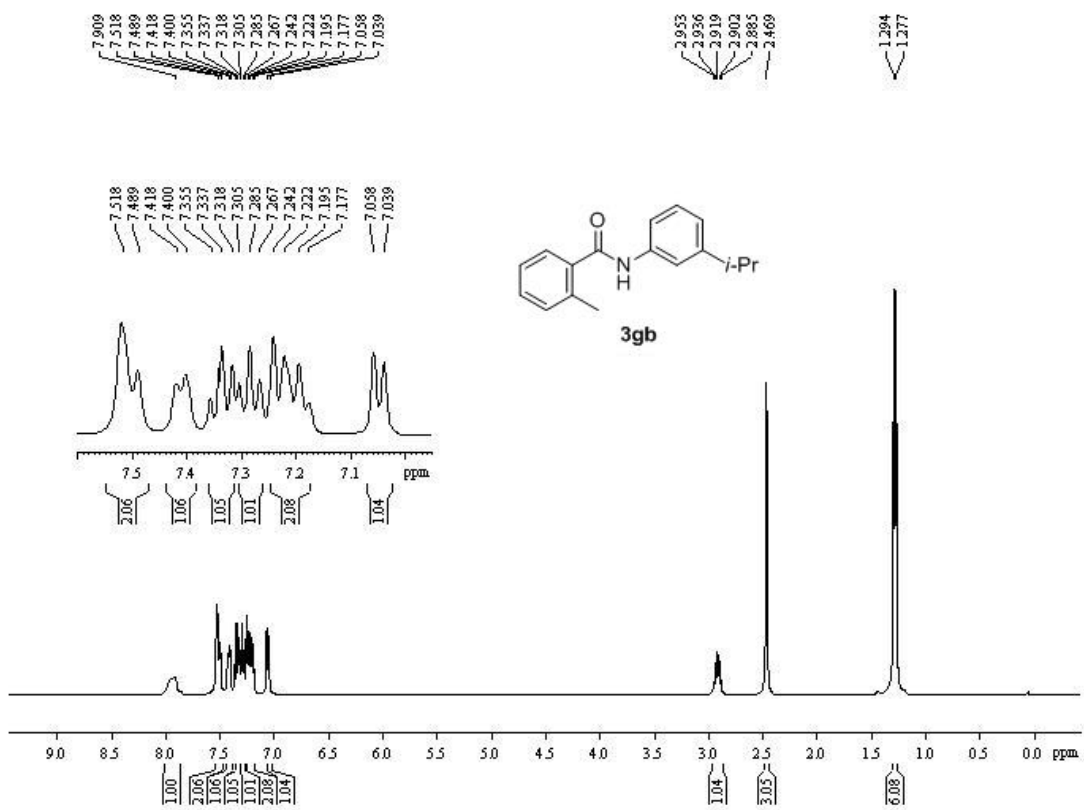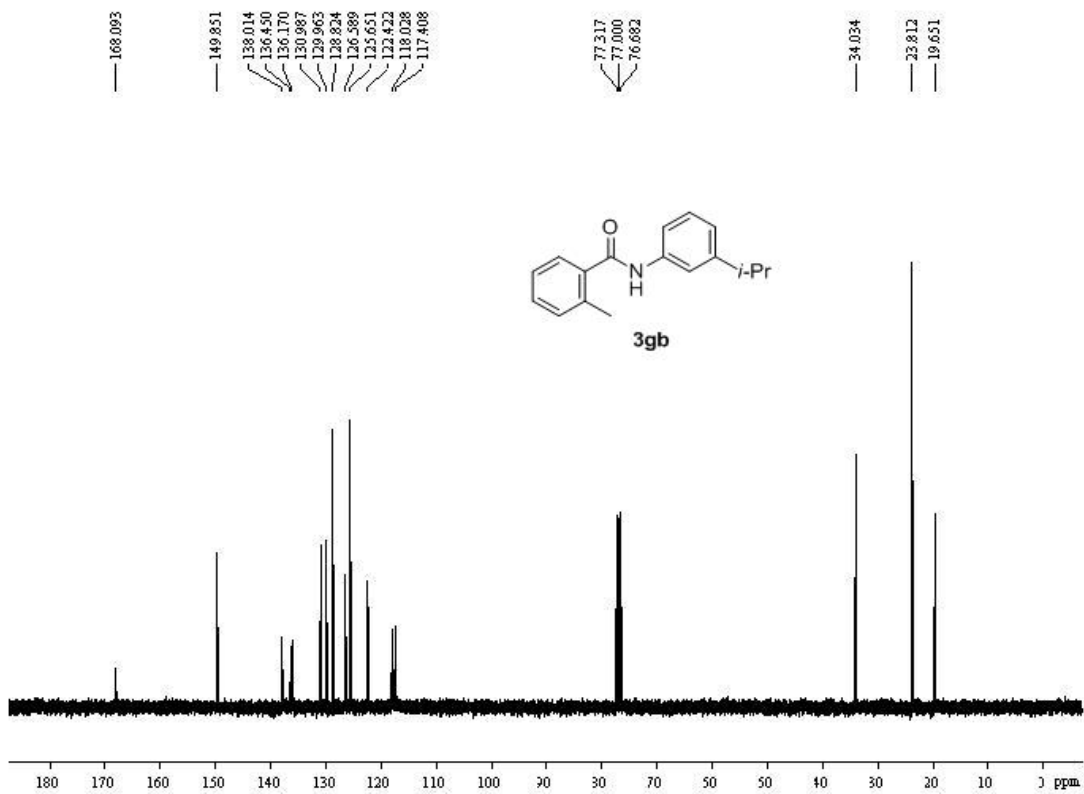



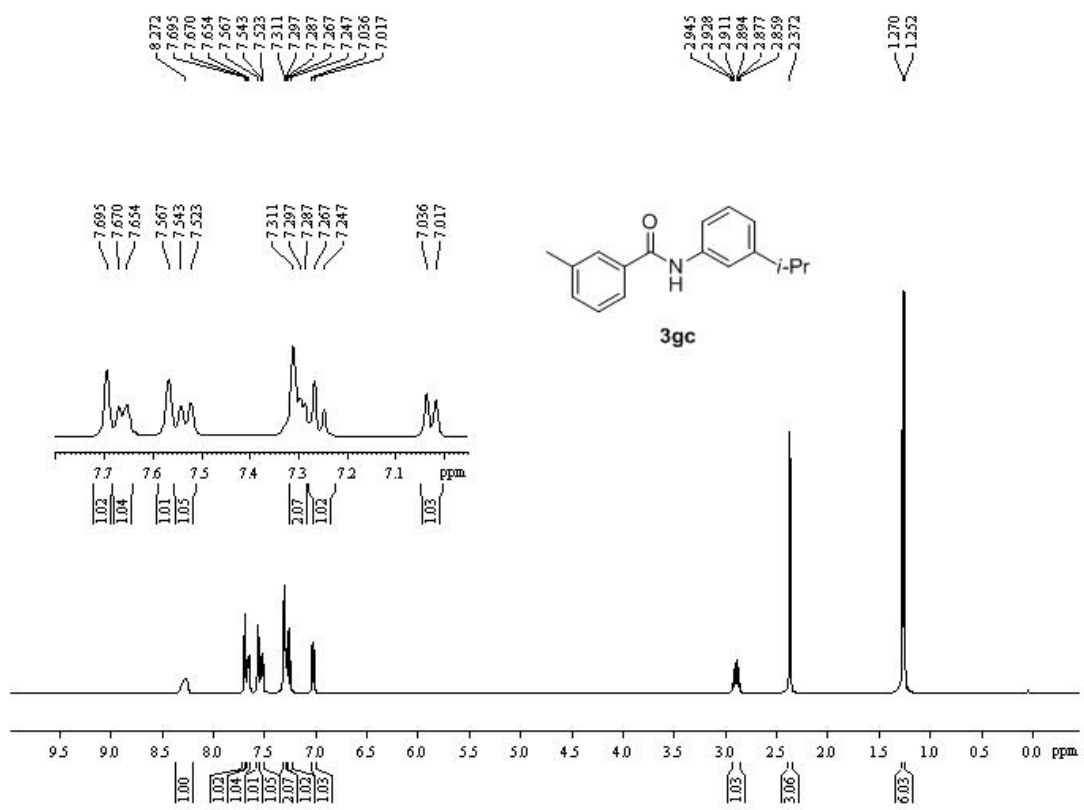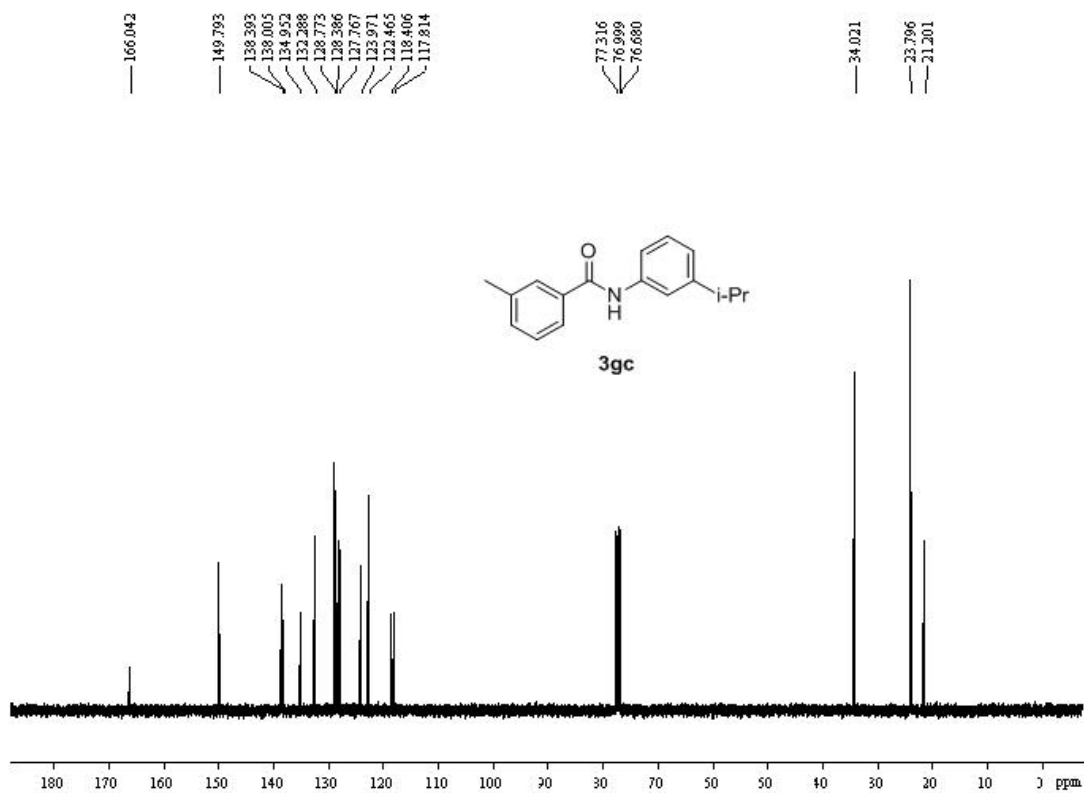

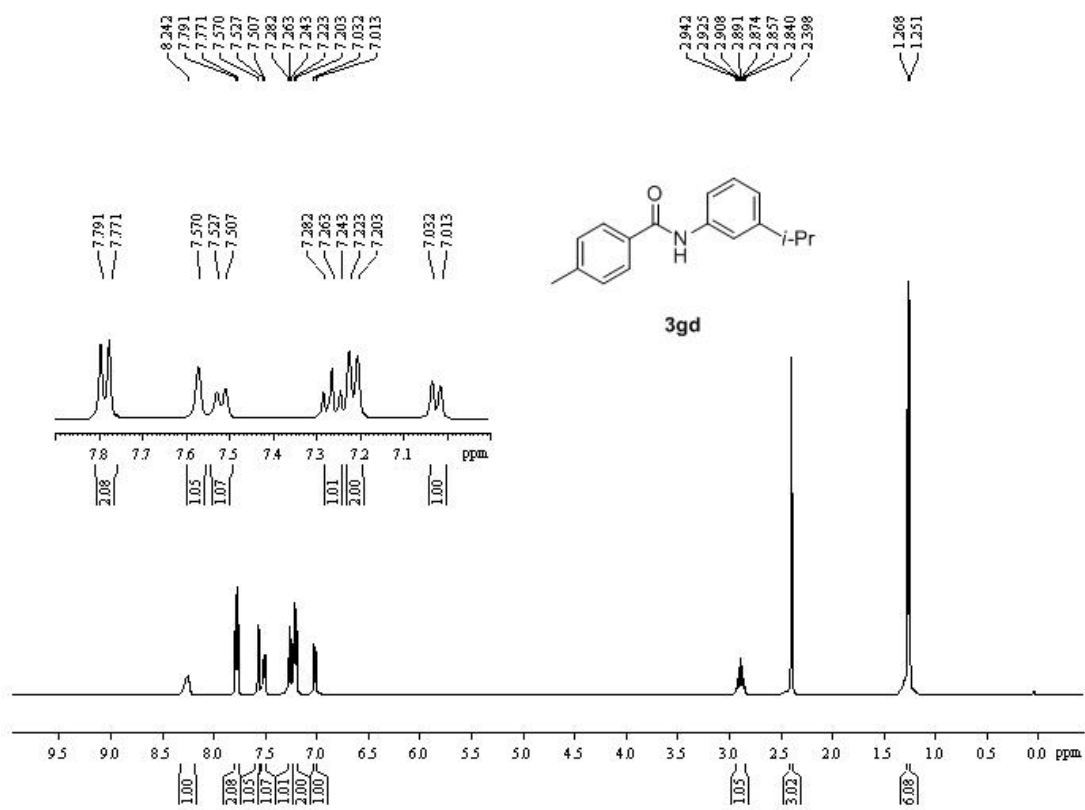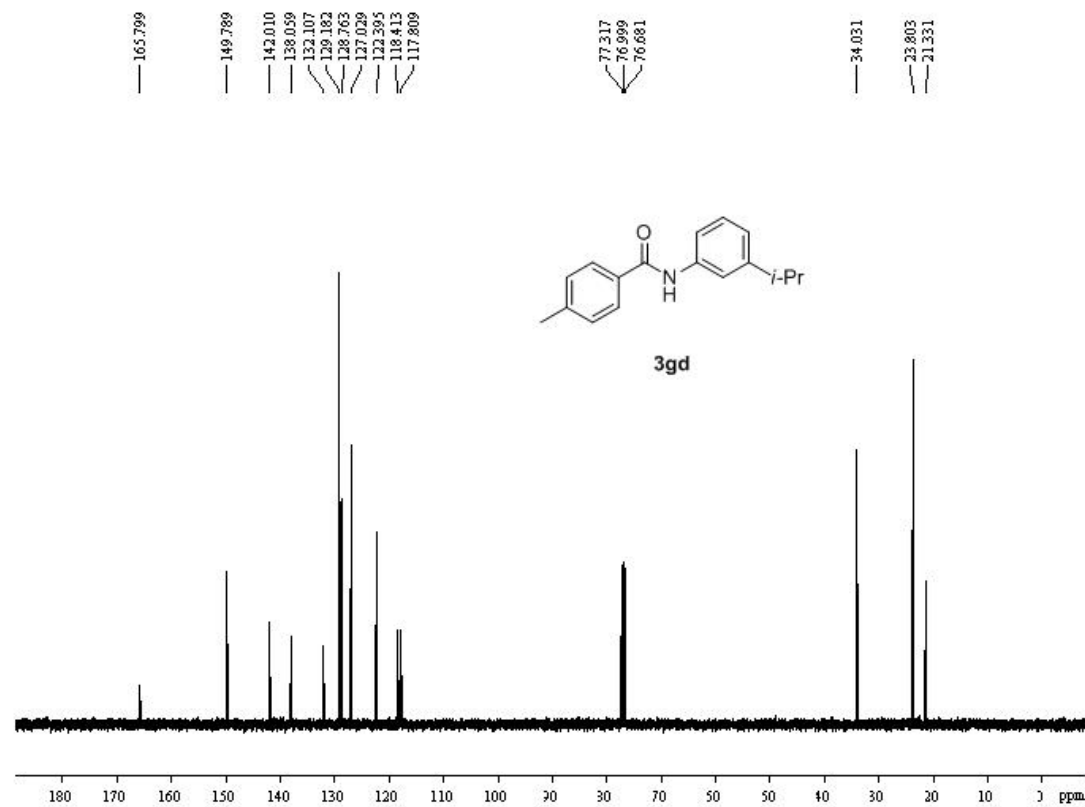

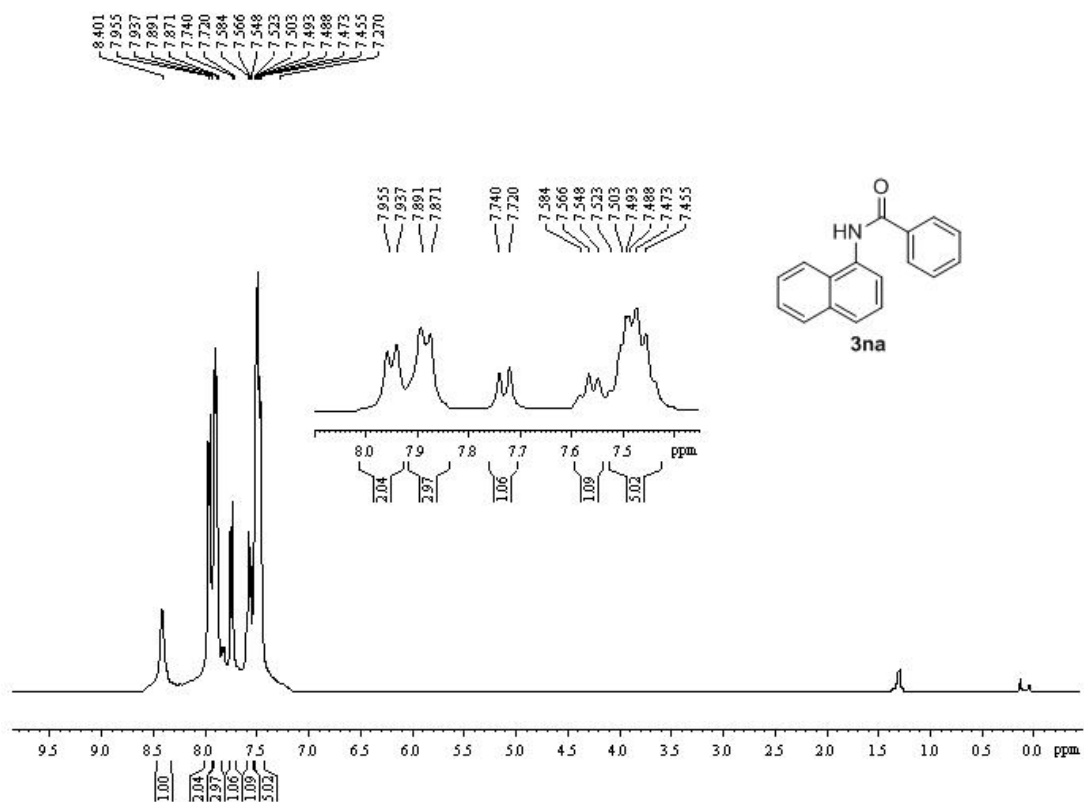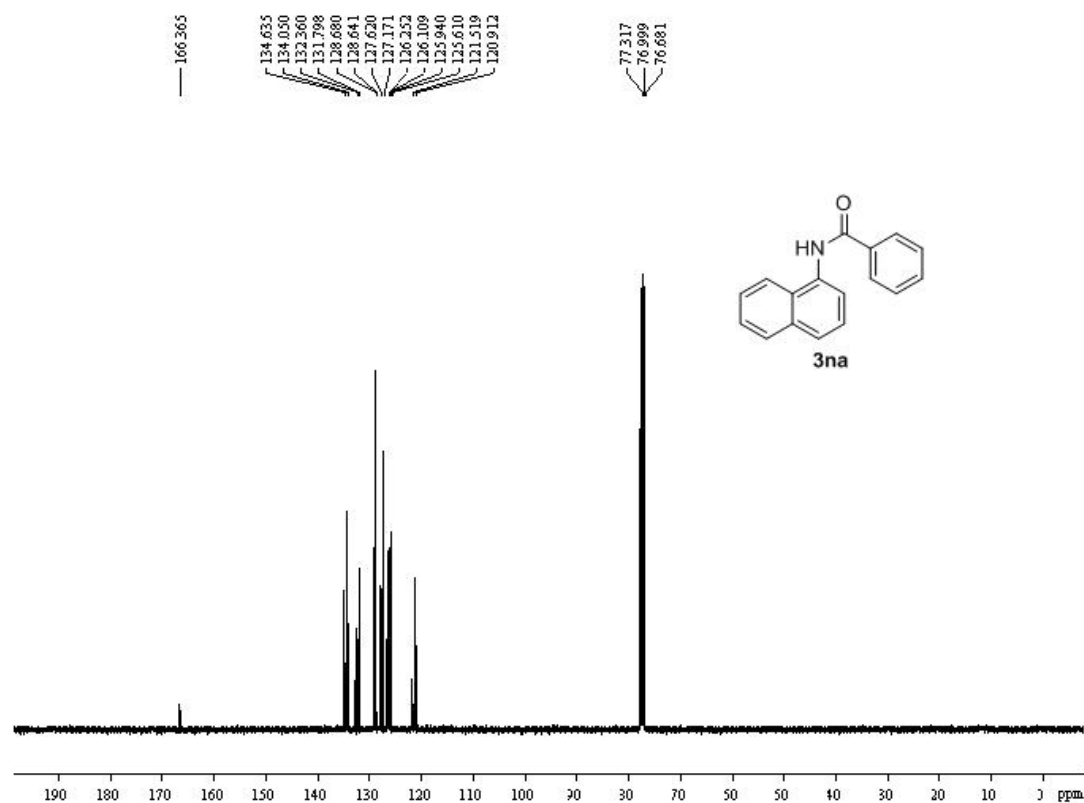

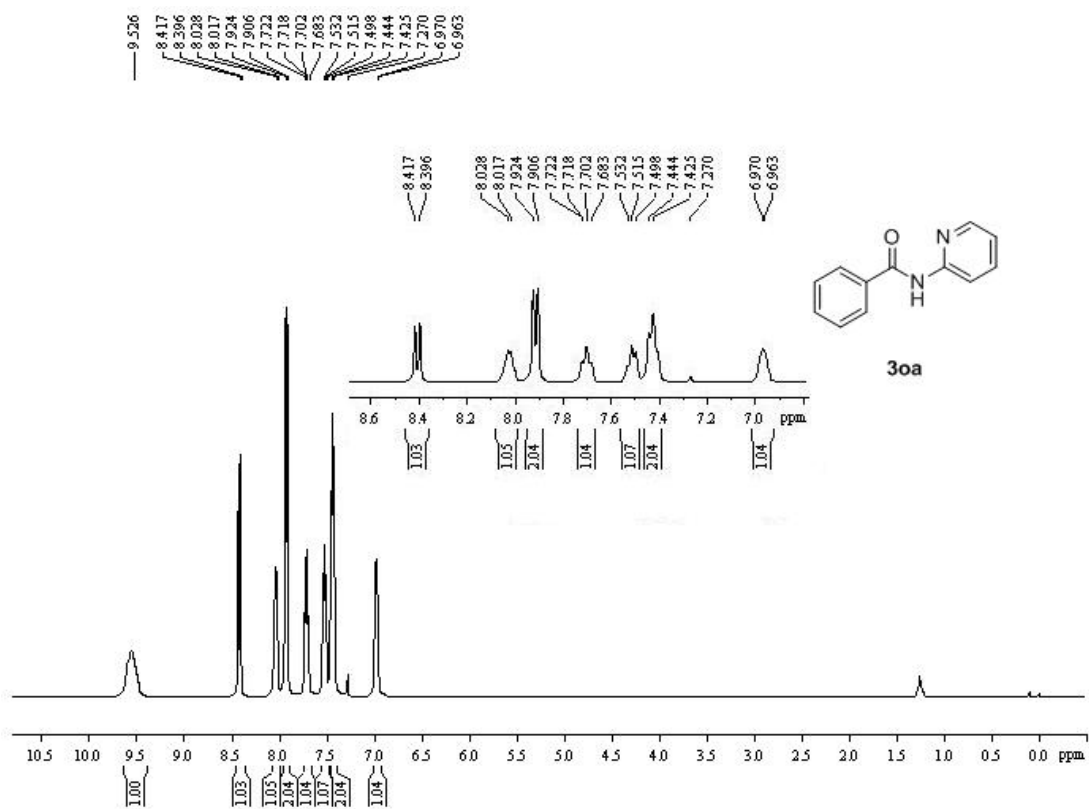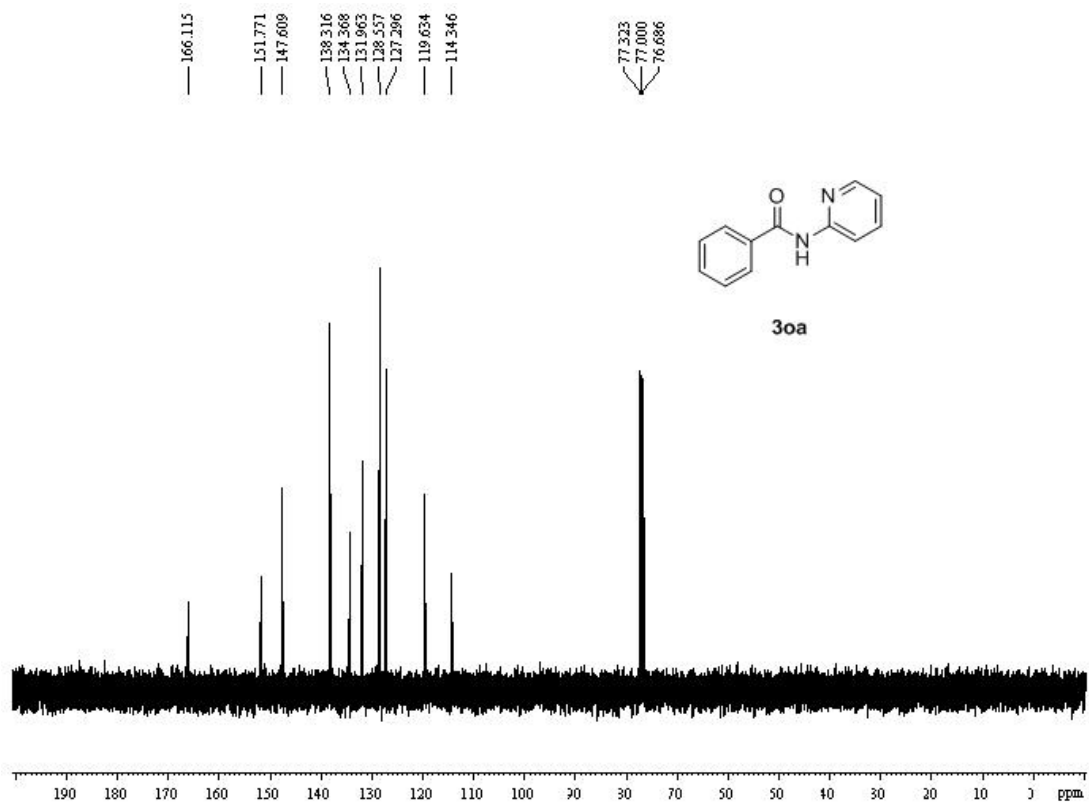

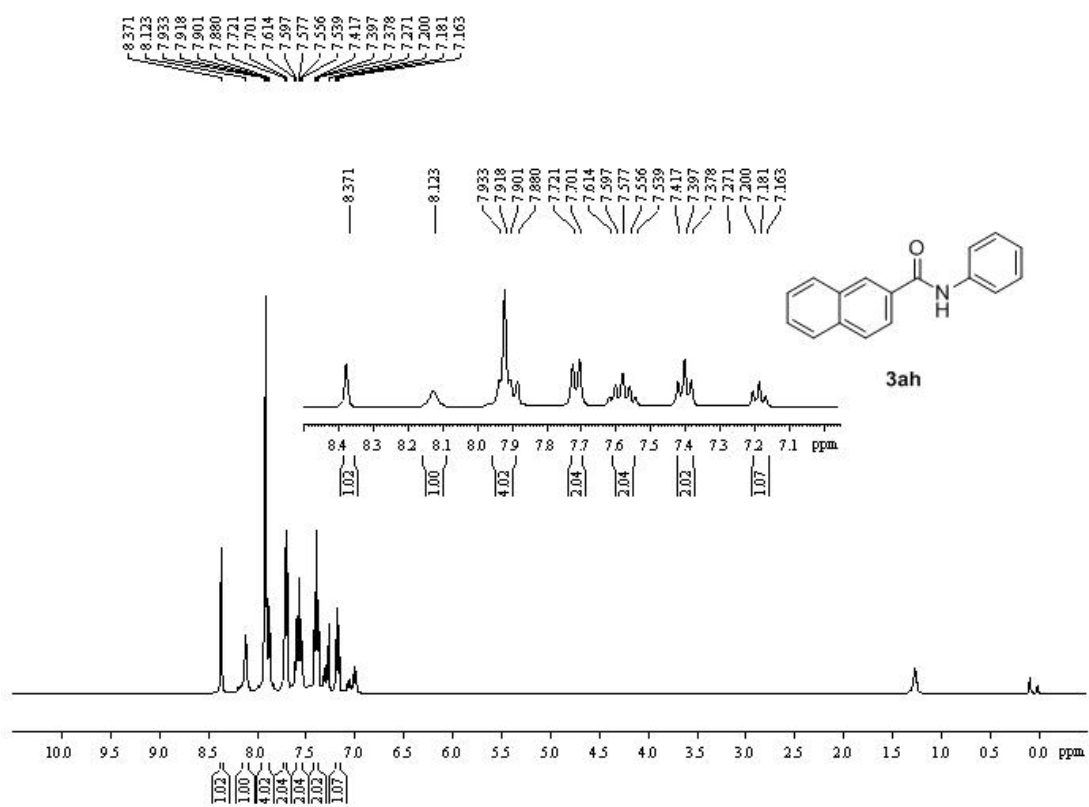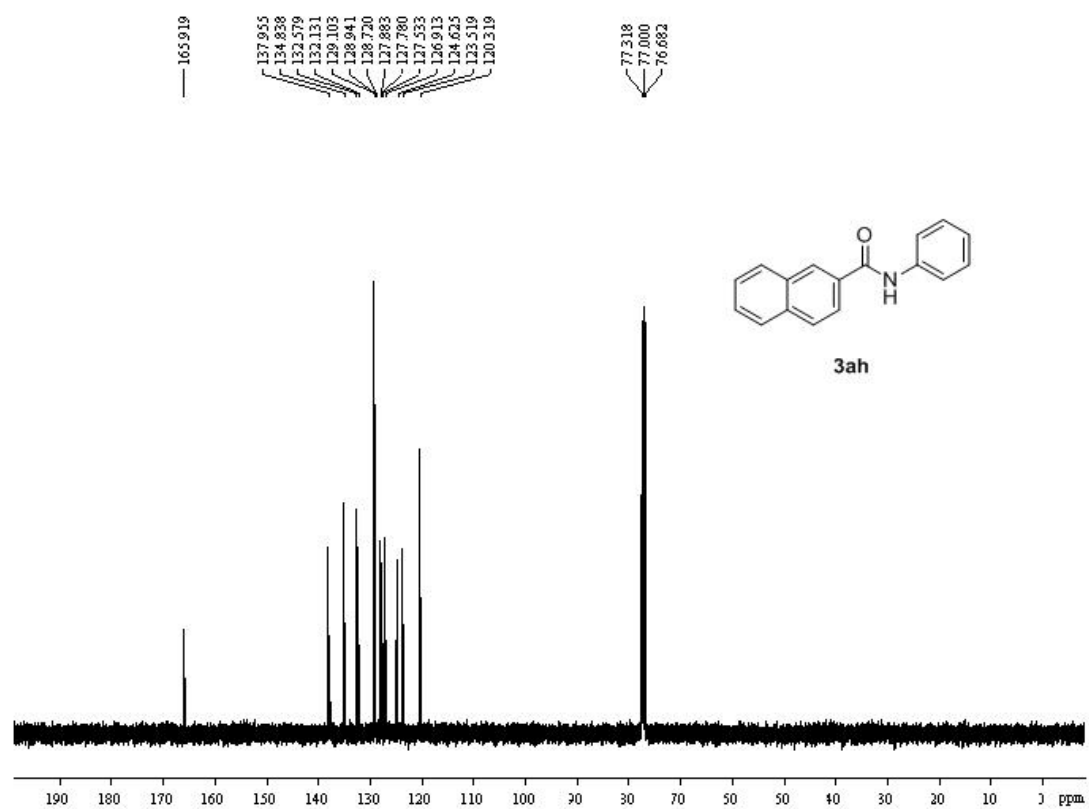

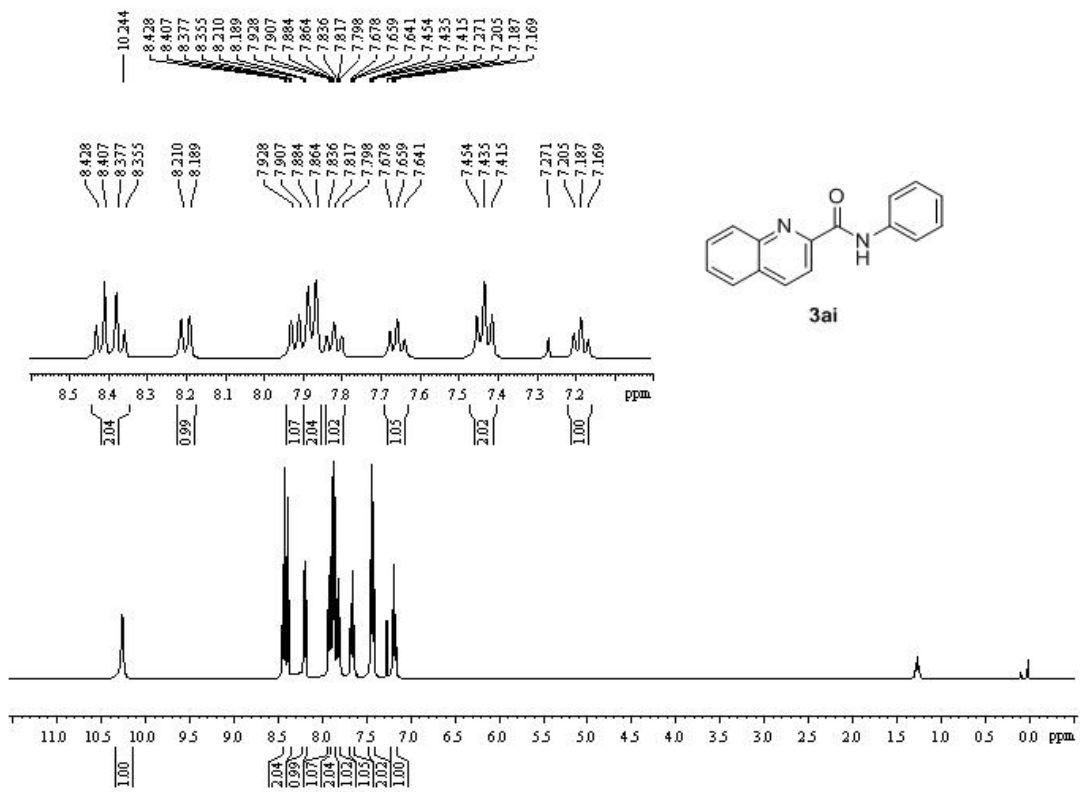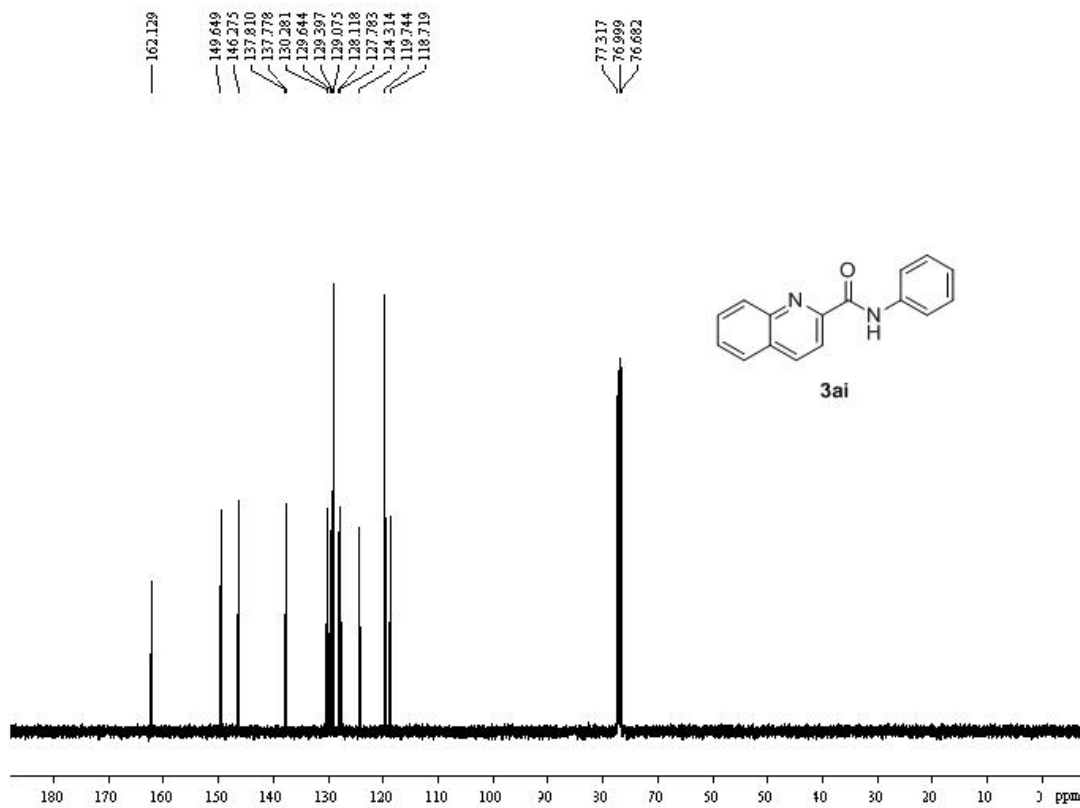

Supplement: c4ra07658c1.pdf [file c4ra07658c1.pdf]
